# Supplementary material
Source: PubMed Central journal article supplement (PMC5340173)
Supplement: mmc1.pdf [file mmc1.pdf]

**Biophysical Journal, Volume 112**

**Supplemental Information**

**Small-Volume Effect Enables Robust, Sensitive, and Efficient Information Transfer in the Spine**

**Masashi Fujii, Kaoru Ohashi, Yasuaki Karasawa, Minori Hikichi, and Shinya Kuroda**

# **Supplement to “Small-volume effect enables robust, sensitive and efficient information transfer in the spine”**

Masashi Fujii,<sup>1,2</sup> Kaoru Ohashi,<sup>1</sup> Yasuaki Karasawa,<sup>3</sup> Minori Hikichi,<sup>1</sup> and Shinya Kuroda<sup>1,2,4,\*</sup>

<sup>1</sup>Molecular Genetics Research Laboratory, Graduate School of Sciences, University of Tokyo, Bunkyo-ku, Tokyo, Japan

<sup>2</sup>Department of Biological Sciences, Graduate School of Sciences, University of Tokyo, Bunkyo-ku, Tokyo, Japan

<sup>3</sup>Department of Neurosurgery, Graduate School of Medicine, University of Tokyo, Bunkyo-ku, Tokyo, Japan

<sup>4</sup>CREST, Japan Science and Technology Agency, Bunkyo-ku, Tokyo, Japan

\*Corresponding author

E-mail: skuroda@bs.s.u-tokyo.ac.jp (SK)

## Supporting Material Figures

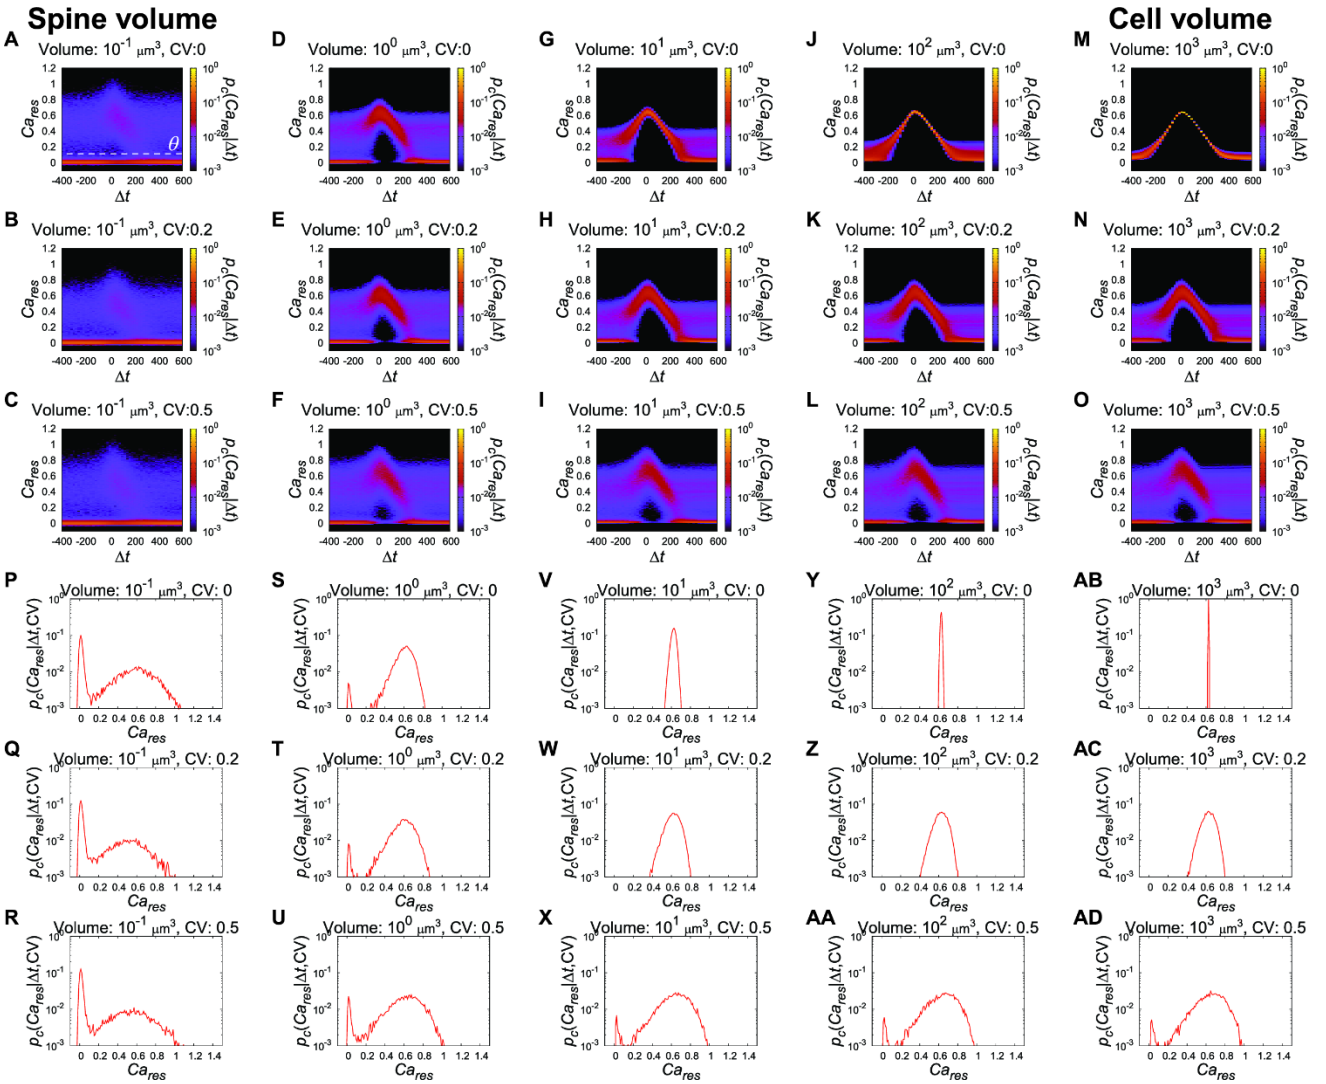

**Figure S1. The  $\Delta t$ -dependency of the distribution of  $Ca_{res}$ .** (A–O) The volume and CV of the amplitude of PF input are indicated. In the spine volume, the distribution of  $Ca_{res}$  is divided into two distributions by the threshold  $\theta = 0.157$  defined as the local minimum of the marginal distribution of  $Ca_{res}$  for  $\Delta t$  s.t.  $p_c(Ca_{res}) = \int_{\Delta t} p_{in}(\tau) p_c(Ca_{res}|\tau) d\tau$ . (P–AD) The cross-sections of (A–O) with  $\Delta t = 0$ . This distribution of  $Ca_{res}$  in the spine volume remained the same regardless of the  $CV_a$  value, whereas, that in the cell volume largely varied.

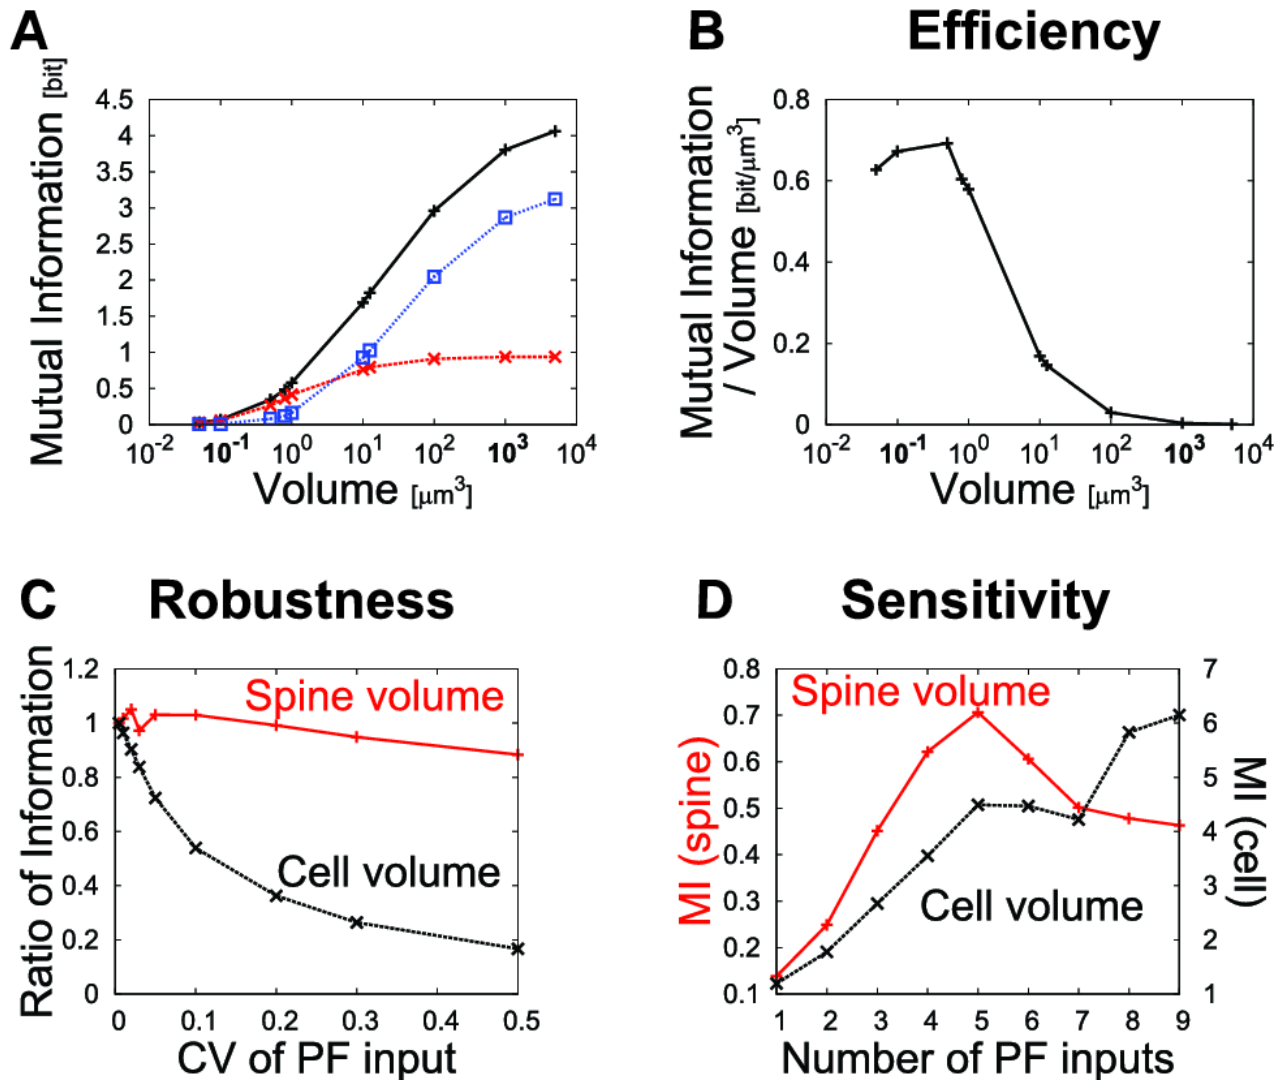

**Figure S2. The efficient, robust and sensitive features of  $\text{Ca}^{2+}$  increase using the detailed stochastic model (23).** (A) The volume dependency of the mutual information between  $\Delta t$ , the PF- and CF-timing, and  $\text{Ca}_{res}$ ,  $\text{Ca}^{2+}$  response. Total mutual information is indicated in *black*; that of the probability component is indicated in *red*; that of the amplitude component is indicated in *blue*. (B) The volume dependency of the mutual information per volume. (C) The CV of the amplitude of PF input dependency of the mutual information. (D) The number of PF inputs dependency of the mutual information. In the detailed stochastic model, the spine volume is  $10^{-1} \mu\text{m}^3$  and the cell volume is  $5 \times 10^3 \mu\text{m}^3$  (23)

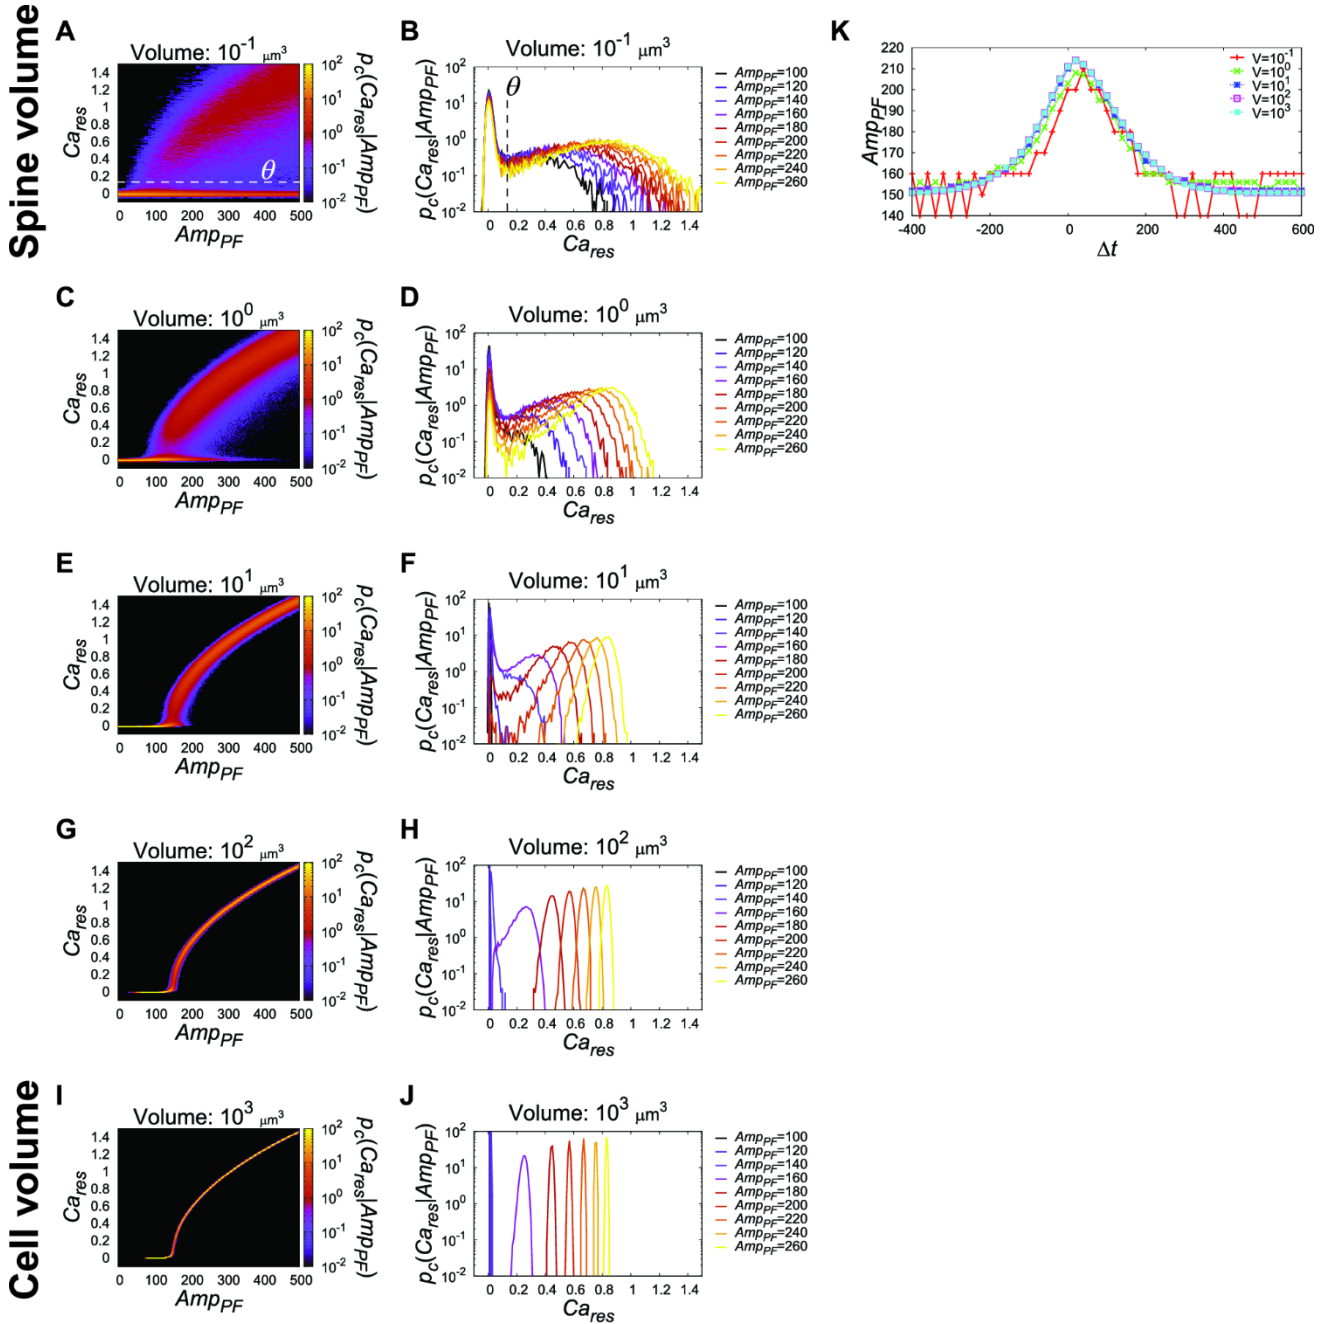

**Figure S3. The  $Amp_{PF}$ -dependency of the distribution of  $Ca_{res}$  in the indicated volumes. (A, C, E, G, I) Distribution of  $Ca_{res}$ . (B, D, F, H, J) The cross-section of distribution of  $Ca_{res}$  at the indicated  $Amp_{PF}$ .  $\theta(=0.157)$  indicates the threshold dividing the distribution into the ranges with large  $Ca_{res}$  and with small  $Ca_{res}$  (see Fig. S1). (K) The  $Amp_{PF}$  providing  $p_c(Ca_{res}|Amp_{PF})$ , the distribution of  $Ca_{res}$  with PF input alone, closest to  $p_c(Ca_{res}|\Delta t)$ , the distribution of  $Ca_{res}$  with PF and CF inputs with various  $\Delta t$ .**

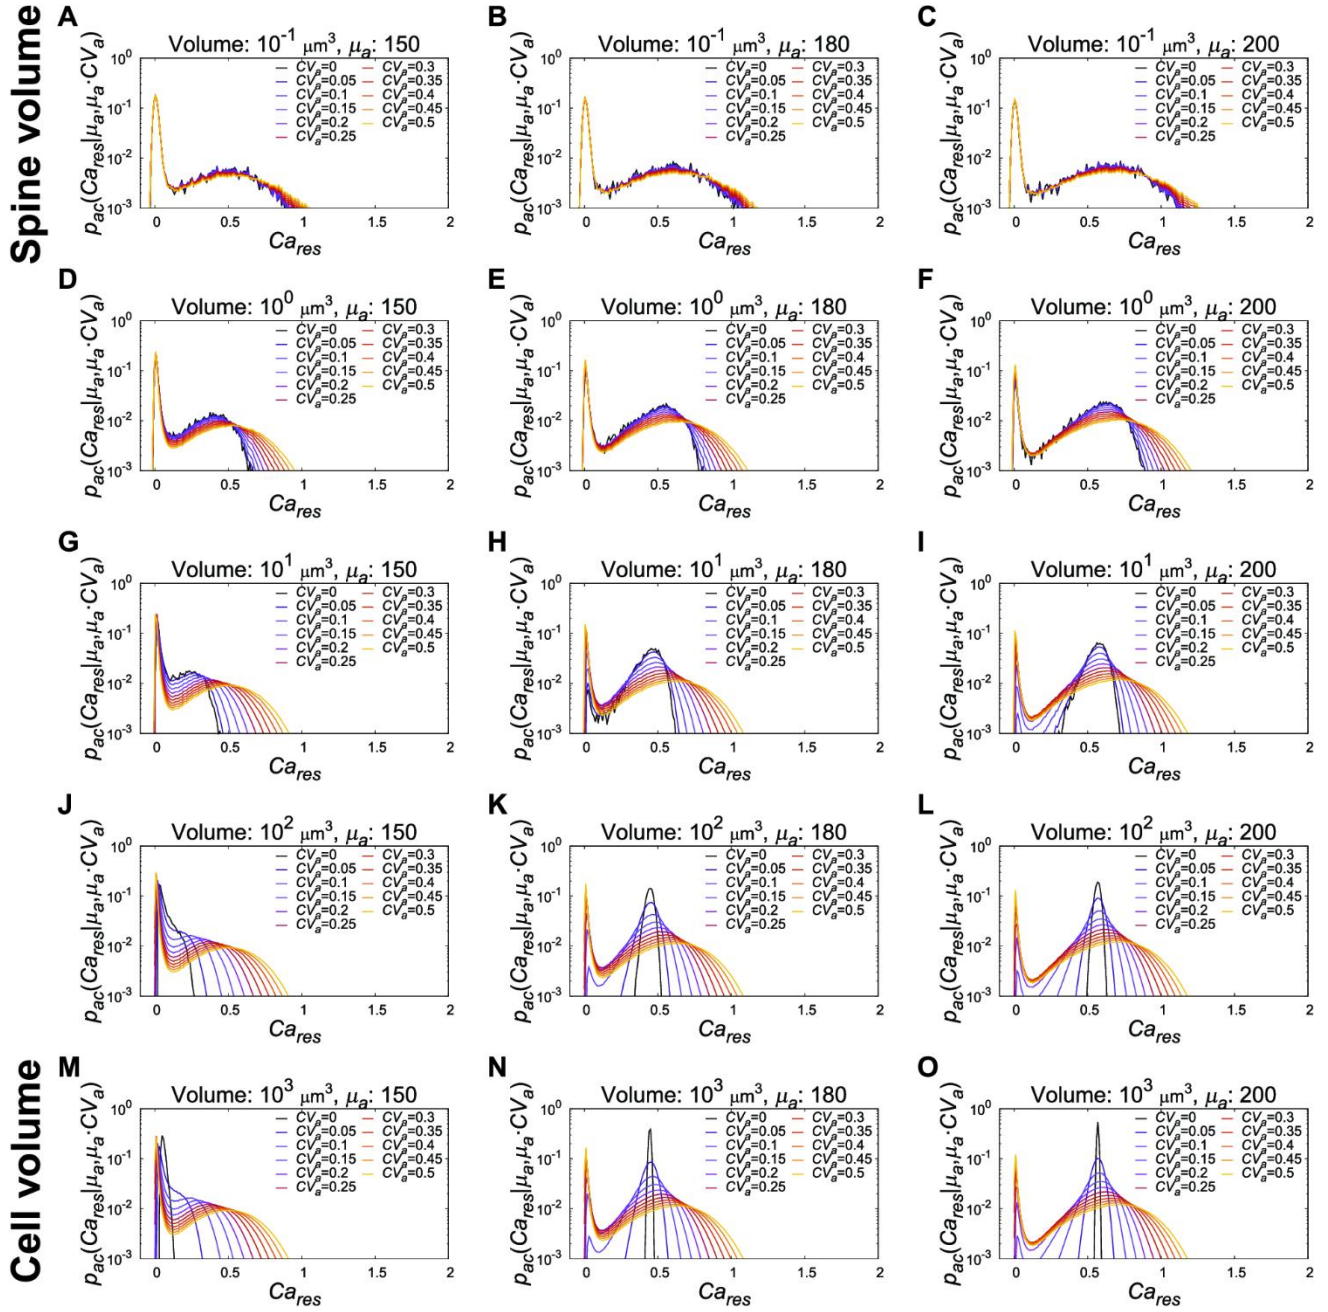

**Figure S4. Distributions of  $Ca_{res}$  against  $CV_a$  with the indicated volumes and  $\mu_a$ , the average of  $Amp_{PF}$ .**

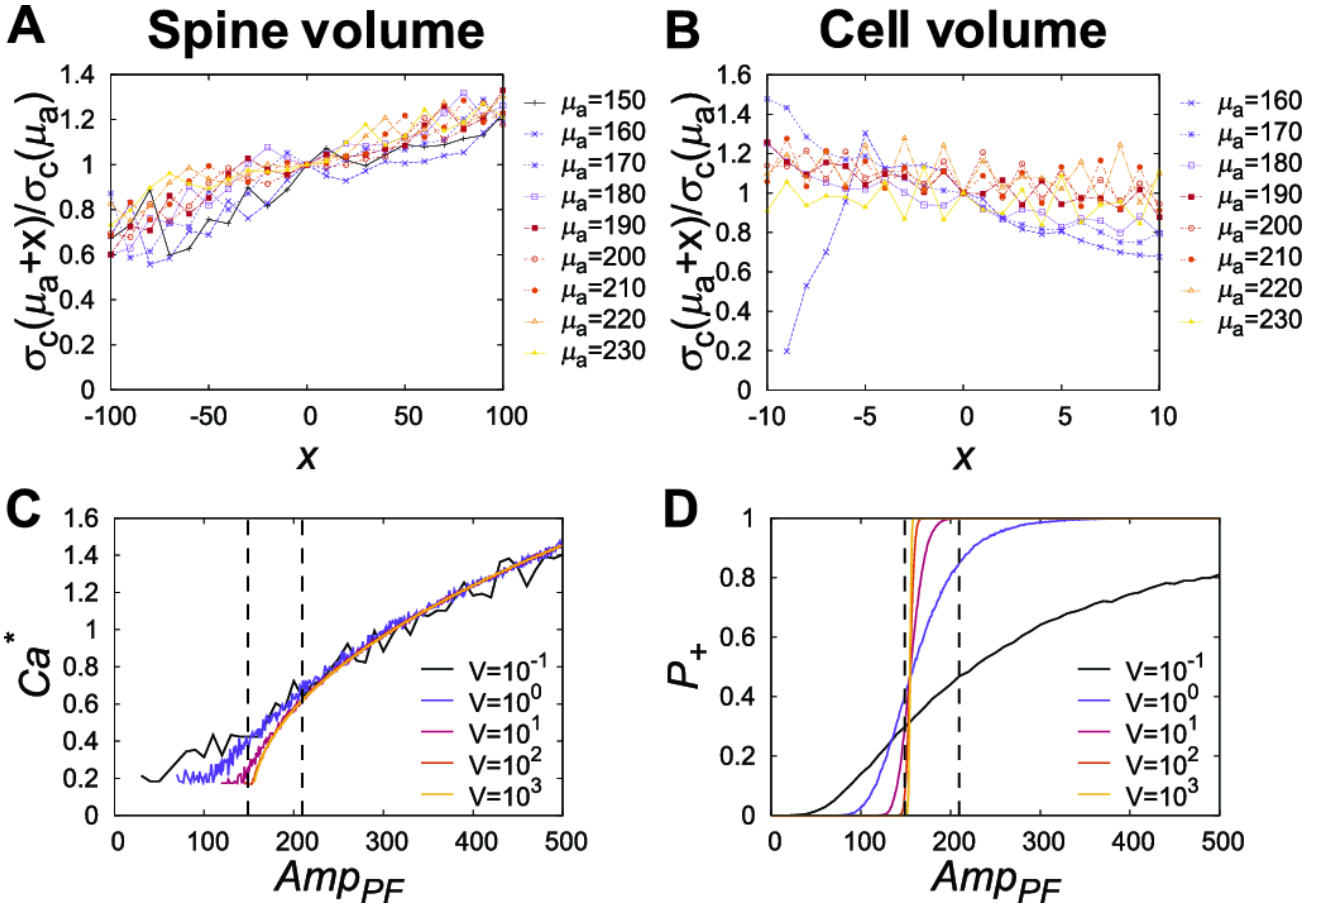

**Figure S5. The  $Amp_{PF}$  dependency of  $\sigma_c$ ,  $Ca^*$  and  $P_+$ .** (A, B)  $\sigma_c(\mu_a + x)$  can be regarded as  $\sigma_c(\mu_a)$  up to the upper bound of the range of  $x$  satisfying the Eq. 21 in the main text. (A) Spine volume. (B) Cell volume.  $\sigma_c(\mu_a + x)/\sigma_c(\mu_a)$  were almost within the range of 0.8 to 1.2, assuming that  $\sigma_c(\mu_a + x)$  is approximated by  $\sigma_c(\mu_a)$ . The upper bound of the range of  $x$  satisfying Eq. 21 in the main text in the spine and cell volumes are determined by  $\delta_{max}$  (see Fig. 4A, B). (C) The  $Amp_{PF}$ -dependency of  $Ca^*$ , the mode of the distribution of  $Ca_{res}$  for  $Ca_{res} > \theta$ . (D) The  $Amp_{PF}$ -dependency of  $P_+$ , the probability of  $Ca_{res} > \theta$ .

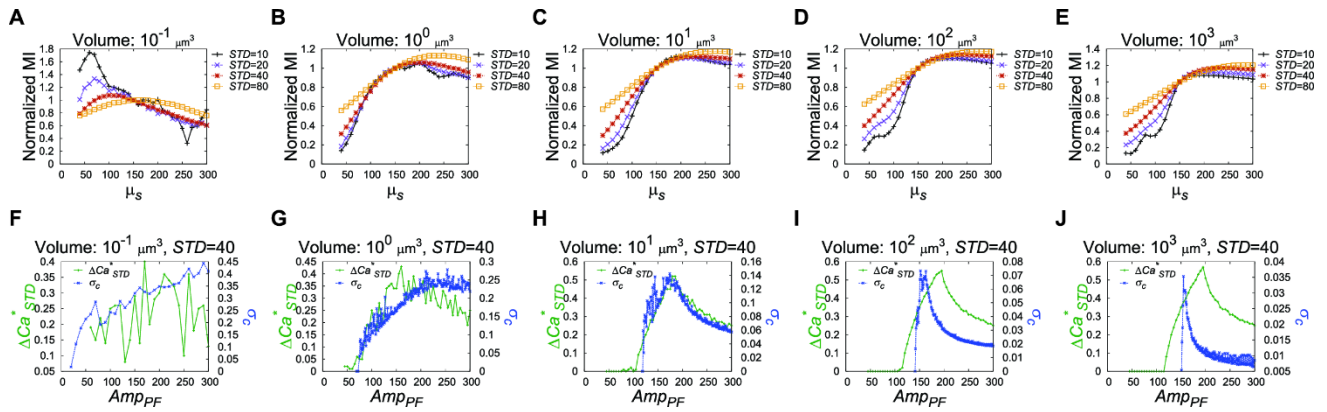

**Figure S6. Mechanism of the sensitivity.** (A–E)  $\mu_s$ , the average of the input distribution of  $Amp_{PF}$ , dependency of the mutual information normalized by the value of that with  $Amp_{PF} = 150$ . (F–J) The  $Amp_{PF}$  dependencies of  $\Delta Ca^*_{STD}$ , the dynamic range of the distribution of  $Ca_{res}$ , (green) and  $\sigma_c$ , the standard deviation of  $Ca_{res}$ , (blue) for  $Ca_{res} > \theta$ . The volume is indicated.



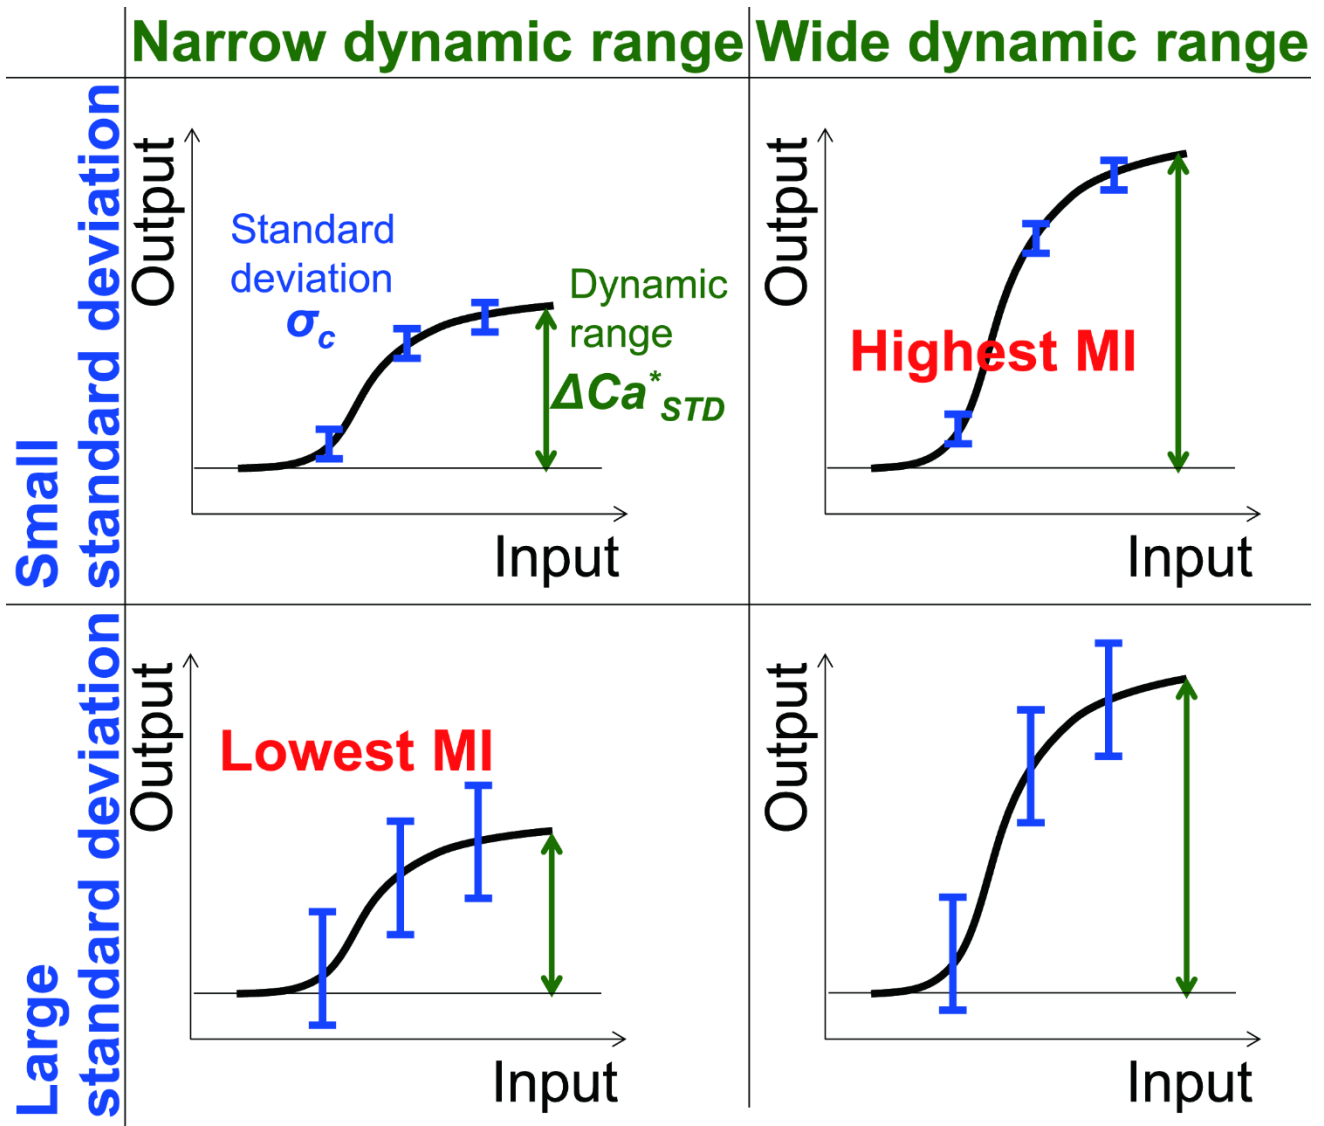

Figure S7. The mutual information depends on both  $\Delta Ca_{STD}^*$ , the dynamic range, and  $\sigma_c$ , the standard deviation of the distribution of the output. In general, if the input distribution is the same, then the wider  $\Delta Ca_{STD}^*$ , the dynamic range of the output, gives more mutual information when  $\sigma_c$ , the standard deviation of the output, is the same (compare the *left* and *right* panels). The smaller  $\sigma_c$  gives more mutual information when  $\Delta Ca_{STD}^*$  is the same (compare the *top* and *bottom* panels).

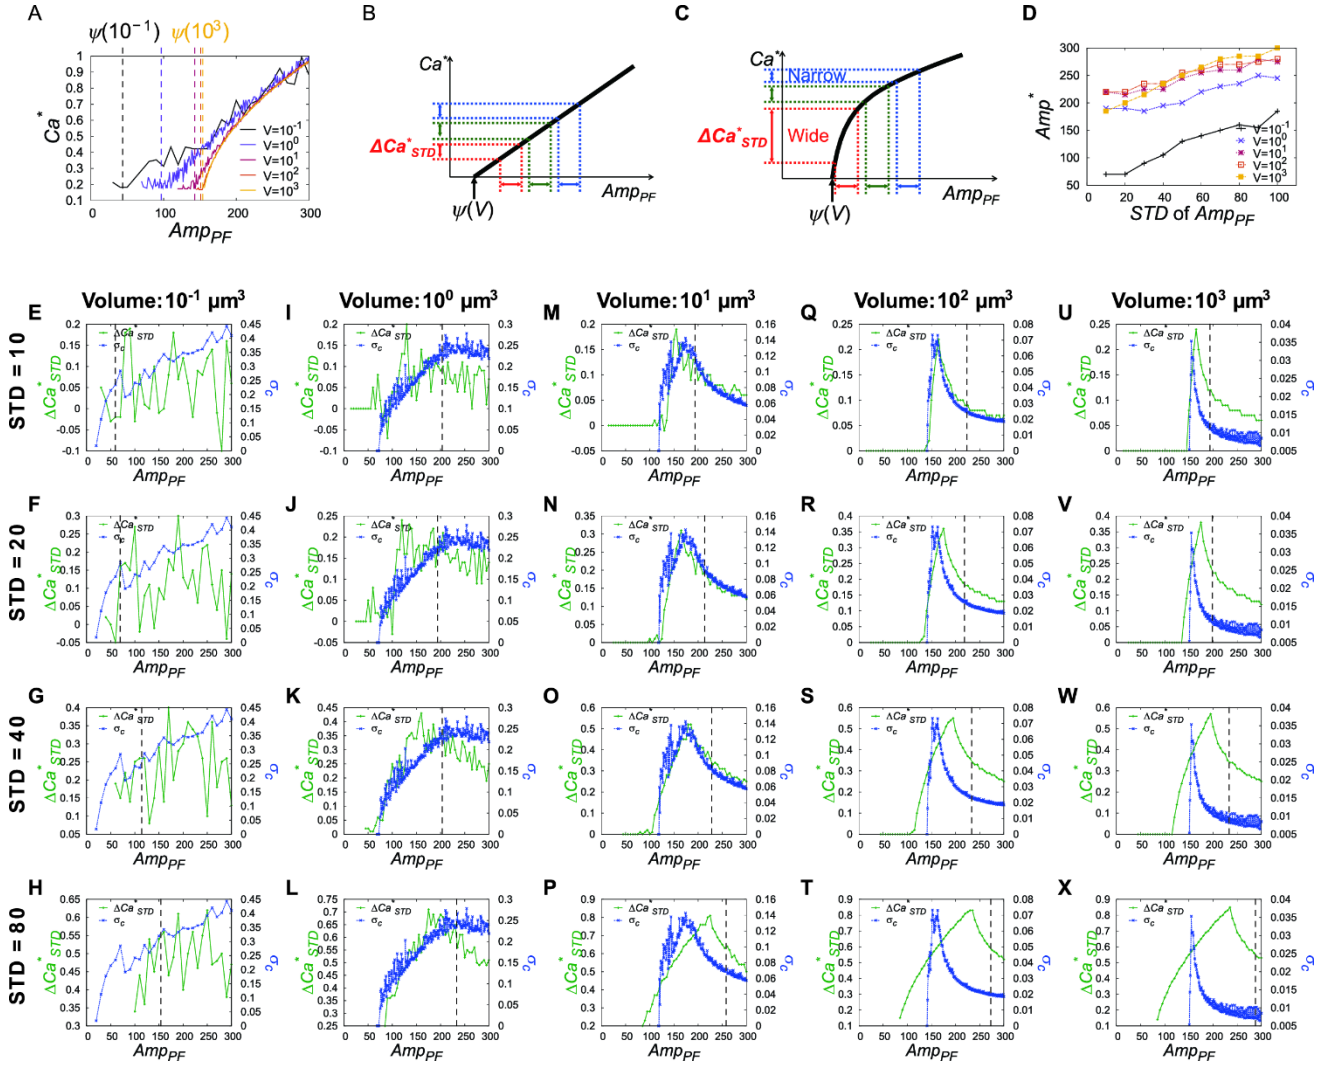

**Figure S8.**  $\Delta Ca^*_{STD}$ , the dynamic range, and  $\sigma_c$ , the standard deviation of the distribution of the output. (A) The  $Amp_{PF}$  dependency of  $Ca^*$ , the mode of the distribution of  $Ca_{res}$  for  $Ca_{res} > \theta$ . We defined  $\psi(V)$  for each volume of the  $Amp_{PF}$  when the  $Ca^*$  began to increase. In the spine volume,  $\psi(10^{-1})$  was approximately 50, whereas,  $\psi(10^3)$  was approximately 150 in the cell volume. (B, C) The schematic representation of the relationship between  $Amp_{PF}$  and  $Ca^*$  in the spine volume (B) and in the cell volume (C). (D) The STD of  $Amp_{PF}$  dependency  $Amp^*$ ,  $Amp_{PF}$  providing the maximum mutual information. (E–X) The  $Amp_{PF}$  dependencies of  $\Delta Ca^*_{STD}$ , the dynamic range of the distribution of  $Ca_{res}$  for  $Ca_{res} > \theta$ , (green) and  $\sigma_c$ , the standard deviation of the distribution of  $Ca_{res}$  (blue). The volume and STD are indicated.

## Supporting Material Tables

**Table S1. Parameters of the simple stochastic model in this study.**

| Parameters                  | Values         |
|-----------------------------|----------------|
| $\tau_{PF}$ [msec]          | 120            |
| $\tau_{CF}$ [msec]          | 10             |
| $\tau_{FB}$ [msec]          | 80             |
| $Amp_{GIP_3R}$              | 1291.6667      |
| $k$ [ $1/\mu\text{m}^3$ ]   | 626.3027       |
| $K$ [ $1/\mu\text{m}^3$ ]   | 626.3027       |
| $n_{IP_3R}$                 | 2.7            |
| $C_b$ [ $1/\mu\text{m}^3$ ] | 25.052108      |
| $V$ [ $\mu\text{m}^3$ ]     | $10^{-1}-10^3$ |

**Table S2. Parameters that are different between the cases with various PF- and CF-timing and with single PF input alone.**

| Parameters                       | Values                          |                                       |
|----------------------------------|---------------------------------|---------------------------------------|
|                                  | PF and CF input (Figs. 1 and 2) | PF input alone (Figs. 3, 4, 5, and 6) |
| $Amp_{CF}$ [ $1/\mu\text{m}^3$ ] | 361.328                         | None                                  |
| $Amp_{PF}$ [ $1/\mu\text{m}^3$ ] | $30.11 \times 5$ times          | Variable $\times 1$ time              |
| $t_{CF}$ [msec]                  | variable                        | None                                  |
| $t_{PF}$ [msec]                  | {0, 10, 20, 30, 40}             | 0                                     |
| CV of PF input                   | Variable                        | 0 (in simulation)                     |

Note that the simple deterministic model shows the same results as those of the detailed deterministic model; however, with reduction of the model, the PF and CF inputs were non-dimensional values. With the loss of the dimension of the number of molecules, we could not perform the stochastic simulation. Therefore, we re-determined the numbers of PF and CF inputs as follows: The PF input becomes smaller than 1 in the spine volume ( $10^{-1} \mu\text{m}^3$ ), but the PF input needs to be the positive integer. We increased the PF input 6-fold of the simple deterministic model so that the amount of  $\text{IP}_3$ , the mediator of PF input, is the same as that of the detailed stochastic model, resulting in the amplitude of a PF input in the spine volume of 3 ( $Amp_{PF} \times V = 30.11 \times 10^{-1} = 3.011 \simeq 3$ ). We reduced the reaction rate constant of the  $\text{Ca}^{2+}$  release by binding  $\text{IP}_3$  and  $\text{IP}_3\text{R}$  to one sixth to compensate for  $C a_{\text{IP}_3}$ . The CF input increased 6-fold so that the amount of  $\text{Ca}^{2+}$  via the CF input in the simple stochastic model became the same as that in the detailed stochastic model.

## Supporting Material Text

**Derivation: The necessary and sufficient condition for robustness is satisfied when  $\Delta C a^* \ll \sigma_c$**

We tried to examine the upper bound of the range of  $x$  where Eq. 21 in the main text is satisfied and showed that the upper bound of the range of  $x$  in the spine volume is larger than that in the cell volume. Hereafter, each distribution of  $C a_{res}$  for  $C a_{res} > \theta$  and  $C a_{res} \leq \theta$  is approximated by the Gaussian distribution. We examined Eq. 21 in the main text as satisfied when  $\sigma_c$ , the standard deviation of  $C a_{res}$ , is larger than  $\Delta C a^*$ , the gap of the gap of the mode of the distribution of  $C a_{res}$ , with  $Amp_{PF} = \mu_a + x$  and  $Amp_{PF} = \mu_a - x$ . Here, we considered the small gap of  $Amp'_{PF}$ , therefore, for simplicity,  $\sigma_c(\mu_a + x)$  and  $\sigma_c(\mu_a - x)$ , the standard deviations of  $C a_{res}$  with  $Amp_{PF} = \mu_a + x$  and  $Amp_{PF} = \mu_a - x$ , were regarded as  $\sigma_c(\mu_a)$ , the standard deviation of  $C a_{res}$  with  $Amp_{PF} = \mu_a$ , up to the upper bound of the range of  $x$  satisfying Eq. 21 in the main text (see Fig. S5A, B in the Supporting Material).

First, we considered  $p_c(C a_{res} | C a_{res} > \theta, \mu_a + x)$ , the distribution of  $C a_{res}$ , for  $C a_{res} > \theta$  in the spine and cell volumes and we approximated the distribution of  $C a_{res}$  for  $C a_{res} > \theta$  by the Gaussian distribution, given by

$$p_c(C a_{res} | C a_{res} > \theta, \mu_a + x) \simeq \frac{1}{\sqrt{2\pi\sigma_c^2}} \exp \left[ -\frac{(C a_{res} - C a^*(\mu_a + x))^2}{2\sigma_c^2} \right]. \quad (S1)$$

$C a^*$  indicates the mode of the distribution of  $C a_{res}$ , given by

$$C a^*(a) = \arg \max_{C a_{res}} p_c(C a_{res} | C a_{res} > \theta, a). \quad (S2)$$

As mentioned, we assumed  $\sigma_c \equiv \sigma_c(\mu_a \pm x) = \sigma_c(\mu_a)$ .

Then, for  $C a_{res} > \theta$ , we substituted Eqs. 26 in the main text and S1 in right side of Eq. 25 in the main text, and obtained

$$\begin{aligned}
& \frac{1}{2} [p_c(Ca_{res}|\mu_a + x) + p_c(Ca_{res}|\mu_a - x)] \\
& \simeq \frac{1}{2} \left\{ \frac{P_+(\mu_a + x)}{\sqrt{2\pi\sigma_c^2}} \exp \left[ -\frac{(Ca_{res} - Ca^*(\mu_a + x))^2}{2\sigma_c^2} \right] \right. \\
& \quad \left. + \frac{P_+(\mu_a - x)}{\sqrt{2\pi\sigma_c^2}} \exp \left[ -\frac{(Ca_{res} - Ca^*(\mu_a - x))^2}{2\sigma_c^2} \right] \right\}.
\end{aligned} \tag{S3}$$

Here, we considered  $Ca^*$ .  $Ca^*$  for  $Ca_{res} > \theta$  linearly increased from approximately  $Amp_{PF} = 50$  in the spine volume (Fig. 4A, black line). In the spine volume,  $Ca^*$  for  $Ca_{res} > \theta$  linearly increased with the increase in  $Amp_{PF}$  for  $150 \leq Amp_{PF} \leq 215$ , which corresponds to the range of the PF-CF input timing. Thus, regarding  $Ca^*$  for  $Ca_{res} > \theta$ , we could assume

$$Ca^*(\mu_a \pm x) \simeq Ca^*(\mu_a) \pm \Delta Ca^*(x). \tag{S4}$$

Equation S4 indicates that the difference of  $Ca^*$  with  $Amp_{PF} = \mu_a + x$  and with  $Amp_{PF} = \mu_a$  is the same as that with  $Amp_{PF} = \mu_a$  and with  $Amp_{PF} = \mu_a - x$ , where  $\Delta Ca^*$  indicates the difference of  $Ca^*$  with  $Amp_{PF} = \mu_a \pm x$  and with  $Amp_{PF} = \mu_a$ . In contrast to the spine volume, in the cell volume,  $Ca^*$  abruptly increased at  $Amp_{PF} = 150$ , and gradually increased with the increase in  $Amp_{PF}$  (Fig. S5C in the Supporting Material, yellow line). Therefore, in the cell volume, Eq. S4 is not satisfied at  $Amp_{PF} = 150$ , but it is almost satisfied for  $150 < Amp_{PF} \leq 215$ . Then, we substituted Eq. S4 in the Eq. S3, and obtained

$$\begin{aligned}
&\simeq \frac{1}{2} \left\{ \frac{P_+(\mu_a + x)}{\sqrt{2\pi\sigma_c^2}} \exp \left[ -\frac{(Ca_{res} - Ca^*(\mu_a) - \Delta Ca^*(x))^2}{2\sigma_c^2} \right] \right. \\
&\quad \left. + \frac{P_+(\mu_a - x)}{\sqrt{2\pi\sigma_c^2}} \exp \left[ -\frac{(Ca_{res} - Ca^*(\mu_a) + \Delta Ca^*(x))^2}{2\sigma_c^2} \right] \right\} \\
&= \frac{1}{2\sqrt{2\pi\sigma_c^2}} \exp \left[ -\frac{(Ca_{res} - Ca^*(\mu_a))^2}{2\sigma_c^2} \right] \exp \left[ -\frac{\Delta Ca^*(x)^2}{2\sigma_c^2} \right] \\
&\times \left\{ P_+(\mu_a + x) \exp \left[ \frac{(Ca_{res} - Ca^*(\mu_a))\Delta Ca^*(x)}{\sigma_c^2} \right] \right. \\
&\quad \left. + P_+(\mu_a - x) \exp \left[ -\frac{(Ca_{res} - Ca^*(\mu_a))\Delta Ca^*(x)}{\sigma_c^2} \right] \right\}.
\end{aligned} \tag{S5}$$

Here, we considered the range of  $Ca_{res}$  where  $|Ca_{res} - Ca^*(x)| \leq 3\sigma_c(x)$  is almost satisfied.

Hence, if  $\Delta Ca^*(x) \ll \sigma_c(x)$ , then, we could approximate

$$\simeq \frac{1}{\sqrt{2\pi\sigma_c^2}} \exp \left[ -\frac{(Ca_{res} - Ca^*(\mu_a))^2}{2\sigma_c^2} \right] \left\{ \frac{P_+(\mu_a + x) + P_+(\mu_a - x)}{2} \right\}. \tag{S6}$$

Note that, the upper bound of the range of  $x$  where  $\Delta Ca^* \ll \sigma_c$  determines the upper bound of the range where Eq. 21 in the main text is satisfied. This means that the larger upper bound of the range of  $x$  where  $\Delta Ca^* \ll \sigma_c$  corresponds to the maximum of  $CV_a$  with which the distribution of  $Ca_{res}$  does not change.

Here, we considered the probability that  $Ca_{res}$  exceeds the threshold  $\theta$ ,  $P_+$ . In the spine volume,  $P_+$  gradually increased from  $Amp_{PF} = 50$  and linearly increased for  $100 \leq Amp_{PF} \leq 250$  (Fig. S5D in the Supporting Material, black line). Therefore, in the spine volume,  $P_+$  linearly increased with the increase in  $Amp_{PF}$  for  $150 \leq Amp_{PF} \leq 215$ , which corresponds to the range of the PF-CF input timing. Thus, regarding  $P_+$ , we could assume

$$\frac{1}{2} [P_+(\mu_a + x) + P_+(\mu_a - x)] = P_+(\mu_a). \tag{S7}$$

This equation indicates that the average of the probabilities that  $Ca_{res}$  exceeds the threshold  $\theta$  with  $Amp_{PF} = \mu_a + x$  and  $Amp_{PF} = \mu_a - x$  is the same as the probability that  $Ca_{res}$  exceeds the threshold  $\theta$  with  $Amp_{PF} = \mu_a$ . In the cell volume, the distribution of  $Ca_{res}$  was unimodal, and  $\theta = -\infty$  was assumed; therefore,  $P_+$  was always 1 and Eq. S7 was always satisfied. Therefore, we substituted Eq. S7 in the Eq. S6 and obtained

$$\begin{aligned} \frac{1}{2} [p_c(Ca_{res}|\mu_a + x) + p_c(Ca_{res}|\mu_a - x)] &\simeq \frac{P_+(\mu_a)}{\sqrt{2\pi\sigma_c^2}} \exp \left[ -\frac{(Ca_{res} - Ca^*(\mu_a))^2}{2\sigma_c^2} \right] \\ &= p_c(Ca_{res}|\mu_a) \end{aligned} \quad (S8)$$

for  $Ca_{res} > \theta$ , *i.e.*, Eq. 21 in the main text for  $Ca_{res} > \theta$  is satisfied.

However, for  $Ca_{res} \leq \theta$ , because  $Ca^*$  for  $Ca_{res} \leq \theta$  was almost constant, the distribution  $Ca_{res}$  was mainly characterized only by  $P_-$  of the distribution of  $Ca_{res}$ , indicating

$$p_c(Ca_{res}|Ca_{res} \leq \theta, \mu_a) = p_c(Ca_{res}|Ca_{res} \leq \theta, \mu_a \pm x). \quad (S9)$$

Then, using Eq. 21 in the main text for  $Ca_{res} \leq \theta$ , similar to the case for  $Ca_{res} > \theta$ , we obtained

$$\begin{aligned} &\frac{1}{2} [p_c(Ca_{res}|\mu_a + x) + p_c(Ca_{res}|\mu_a - x)] \\ &\simeq \frac{1}{2} [P_-(\mu_a + x)p_c(Ca_{res}|Ca_{res} \leq \theta, \mu_a + x) \\ &\quad + P_-(\mu_a - x)p_c(Ca_{res}|Ca_{res} \leq \theta, \mu_a - x)] \\ &= \frac{1}{2} [P_-(\mu_a + x)p_c(Ca_{res}|Ca_{res} \leq \theta, \mu_a) + P_-(\mu_a - x)p_c(Ca_{res}|Ca_{res} \leq \theta, \mu_a)] \\ &\simeq \frac{1}{2} [P_-(\mu_a + x) + P_-(\mu_a - x)]p_c(Ca_{res}|Ca_{res} \leq \theta, \mu_a) \\ &= P_-(\mu_a)p_c(Ca_{res}|Ca_{res} \leq \theta, \mu_a) = p_c(Ca_{res}|\mu_a) \end{aligned} \quad (S10)$$

for  $Ca_{res} \leq \theta$ , *i.e.*, Eq. 21 in the main text for  $Ca_{res} \leq \theta$  is also satisfied. Therefore, from Eqs. S8 and S10, we derived Eq. 21 in the main text. Thus, we approximately showed that if  $Ca^*$  and  $P_+$  linearly



increase with the increase in  $Amp_{PF}$  and  $\Delta C a^* \ll \sigma_c$ , then Eq. 21 in the main text was satisfied. This means that the necessary and sufficient condition for robustness is satisfied in the range where the intrinsic noise,  $\sigma_c$ , is larger than the extrinsic noise,  $\Delta C a^*$ .
