# Supplementary material
Source: PubMed Central journal article supplement (PMC5340173)
Supplement: mmc2.pdf [file mmc2.pdf]

# Small-Volume Effect Enables Robust, Sensitive, and Efficient Information Transfer in the Spine

Masashi Fujii,<sup>1,2</sup> Kaoru Ohashi,<sup>1</sup> Yasuaki Karasawa,<sup>3</sup> Minoru Hikichi,<sup>1</sup> and Shinya Kuroda<sup>1,2,4,\*</sup>

<sup>1</sup>Department of Biological Sciences and <sup>2</sup>Molecular Genetics Research Laboratory, Graduate School of Sciences, University of Tokyo, Bukyo-ku, Tokyo, Japan; <sup>3</sup>Department of Neurosurgery, Graduate School of Medicine, University of Tokyo, Bukyo-ku, Tokyo, Japan; and <sup>4</sup>CREST, Japan Science and Technology Agency, Bunkyo-ku, Tokyo, Japan

**ABSTRACT** Why is the spine of a neuron so small that it can contain only small numbers of molecules and reactions inevitably become stochastic? We previously showed that, despite such noisy conditions, the spine exhibits robust, sensitive, and efficient features of information transfer using the probability of  $\text{Ca}^{2+}$  increase; however, the mechanisms are unknown. In this study, we show that the small volume effect enables robust, sensitive, and efficient information transfer in the spine volume, but not in the cell volume. In the spine volume, the intrinsic noise in reactions becomes larger than the extrinsic noise of input, resulting in robust information transfer despite input fluctuation. In the spine volume, stochasticity makes the  $\text{Ca}^{2+}$  increase occur with a lower intensity of input, causing higher sensitivity to lower intensity of input. The volume-dependency of information transfer increases its efficiency in the spine volume. Thus, we propose that the small-volume effect is the functional reason why the spine has to be so small.

## INTRODUCTION

The spine is an extremely small structure, where afferent inputs from other neurons are temporally added (1,2). For example, the volume of a spine at the parallel fiber (PF)-cerebellar Purkinje cell synapse is approximately  $10^{-1}-1 \mu\text{m}^3$  (3). Such volume is  $10^4$ -fold smaller than the cell body ( $5000 \mu\text{m}^3$ ) and contains merely tens or hundreds of molecules (Fig. 1 A; see also Fig. 7) (4–6). Under such conditions, reactions in the spine inevitably become stochastic and inputs fluctuate because of the low number of molecules confined in a small volume (7–11). Intuitively, such noisy conditions are disadvantageous for information processing. Why is the spine so small? This is one of the fundamental questions in neuroscience and biological information processing.

Cerebellar Purkinje cells receive two inputs. One is from more than 100,000 PFs, which are the axons of granular neurons, coding sensorimotor signals. The other input is a single climbing fiber (CF) from the inferior olivary nucleus, which is thought to code an error signal (12–14). A conjunctive activation of PF and CF inputs, but not either the PF input or CF input alone, has been shown to induce large

$\text{Ca}^{2+}$  increases by the  $\text{Ca}^{2+}$  inflow through voltage-gated channels and inositol trisphosphate ( $\text{IP}_3$ )-induced  $\text{Ca}^{2+}$  release (IICR) (15,16), leading to long-term decreases of synaptic strength that are known as cerebellar long-term depression (LTD) (17), which is a tentative molecular basis of cerebellar motor learning (18,19). It has been experimentally shown that a large  $\text{Ca}^{2+}$  increase occurs when PF and CF inputs are coincident within a 200-ms time window (Fig. 1 B), and that the  $\text{Ca}^{2+}$  increase as a function of the timing between PF and CF inputs shows a bell-shaped response (Fig. 1 C) (16). We have previously developed a detailed biochemical deterministic model of the  $\text{Ca}^{2+}$  increase in a PF-cerebellar Purkinje cell synapse, reproducing the PF- and CF-timing-dependent  $\text{Ca}^{2+}$  increases (20). In addition, by reducing this model, we also constructed a simple deterministic model, from which we derived an essential framework of the network for PF- and CF-timing-dependent  $\text{Ca}^{2+}$  increases (21,22).

However, in the spine, the number of molecules is limited to tens to hundreds; therefore, reactions should behave stochastically rather than deterministically. It has been experimentally shown that the  $\text{Ca}^{2+}$  increase due to the coincidence of PF and CF inputs behaves stochastically; in some cases, large  $\text{Ca}^{2+}$  increases are observed, but in other cases they are not large (Fig. 1, B and C). In addition to the intrinsic noise due to the stochastic fluctuation of the transient increases of the  $\text{Ca}^{2+}$  concentration, the PF input has been

Submitted November 9, 2016, and accepted for publication December 29, 2016.

\*Correspondence: skuroda@bs.s.u-tokyo.ac.jp

Editor: Anatoly Kolomeisky

<http://dx.doi.org/10.1016/j.bpj.2016.12.043>

© 2017 Biophysical Society.

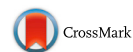

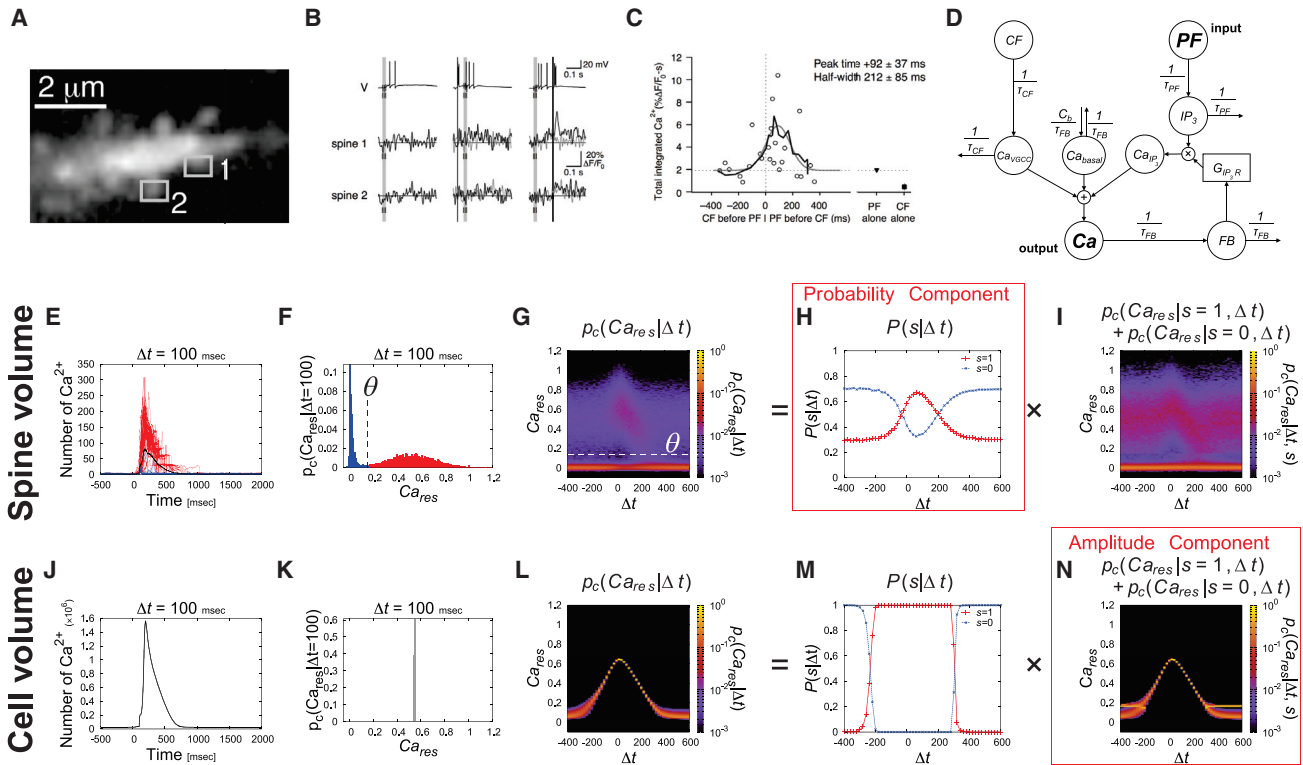

**FIGURE 1** Information transfer of PF- and CF-timing by probability of  $\text{Ca}^{2+}$  increase in the simple stochastic model. (A–C) Experimental results of  $\text{Ca}^{2+}$  increase by PF and CF inputs at the spine in the cerebellar Purkinje cell (16). (A) Spines of the cerebellar Purkinje cell are shown. (B)  $\text{Ca}^{2+}$  responses in the indicated spines in (A) are shown. V indicates membrane potential and  $\Delta F/F_0$  indicates the normalized changes of the fluorescence probe of  $\text{Ca}^{2+}$ . The left, middle, and right panels show the time courses with only the PF input (shaded vertical line), with the CF input (black vertical line) 60 ms before the PF input and with the PF input 60 ms before the CF input, respectively. (C) Total integrated  $\text{Ca}^{2+}$  with PF and CF inputs with various timing are shown. The gray line indicates the best fits of the raw data points to Gaussian functions. The black line indicates the box-smoothed average over three points. (D) The block diagram of the simple stochastic model in this study (see Materials and Methods) is provided. After Fig. 3, we set  $CF = 0$  and used only PF as the input.  $\text{Ca}^{2+}$  increase in the spine volume ( $10^{-1} \mu\text{m}^3$ ) (E–I) and in the cell volume ( $10^3 \mu\text{m}^3$ ) (J–N) in the simple stochastic model. (E and J)  $\text{Ca}^{2+}$  increase with  $\Delta t = 100$  ms is provided.  $\Delta t$  indicates the timing interval between PF and CF inputs, which is the timing of the PF input set as 0 and  $\Delta t$  with the PF input before CF input is positive, and vice versa. (E) The large  $\text{Ca}^{2+}$  increase (red) and small  $\text{Ca}^{2+}$  increase (blue) divided by  $\theta$  in (F) are provided. (F and K) The probability density distribution of  $\text{Ca}_{res}$  is provided.  $\text{Ca}_{res}$  denotes the area under the curve of the time course of  $\text{Ca}^{2+}$ , subtracted by the basal  $\text{Ca}^{2+}$  concentration, shown in (E) and (J). (F) The threshold  $\theta$  is defined as the local minimum of the marginal distribution for  $\Delta t$ , given by  $p_c(\text{Ca}_{res}) = \int_{\Delta t} p_c(\text{Ca}_{res} | \tau) p_{in}(\tau) d\tau$  (see Fig. S1). (G and L) The probability density distribution of  $\text{Ca}_{res}$  in the spine volume (G) and cell volume (L) are provided. (H and M) The probability component of the distribution of  $\text{Ca}_{res}$  that exceeds the threshold  $\theta$  in the spine volume ( $s = 1$ ) (see Materials and Methods) is provided. Because the distribution of  $\text{Ca}_{res}$  in the cell volume is unimodal distribution, for convenience, we set  $\theta = 0.157$  in the cell volume, which is the same as that in the spine volume. (I and N) The amplitude component of the distribution of  $\text{Ca}_{res}$  (see Materials and Methods) is provided. Images are used with permission from Wang et al. (16). To see this figure in color, go online.

shown to fluctuate due to the stochasticity of the glutamate release from the presynapse (9–11), which can be regarded as extrinsic noise. In this study, the extrinsic noise means the PF input fluctuation rather than the different initial conditions such as the molecular concentration/numbers in the individual spines. Based on the deterministic model (20), we constructed a stochastic simulation model of the  $\text{Ca}^{2+}$  increase depending on PF- and CF-timing incorporating the stochastic reactions due to the small number of molecules (23). We have previously shown that the spine uses the probability of the  $\text{Ca}^{2+}$  increase, rather than its amplitude, for information transfer, and that the probability of the  $\text{Ca}^{2+}$  increase in the spine shows robustness against input fluctuation, sensitivity to lower input numbers, and efficiency in in-

formation transfer (23). The more detailed definitions of the robustness, sensitivity, and efficiency were described below in the corresponding parts (see Results). However, the robustness, sensitivity, and efficiency were not characterized, and their informational mechanisms remain unknown.

In this study, we constructed a simple stochastic model based on the simple deterministic model (21). Note that the detailed stochastic model contains a large number of molecules and reactions so that it is hard to perform the stochastic simulation of the deterministic model with various parameters, such as the amplitude of PF inputs. Using the simple stochastic model, we define the robustness, sensitivity, and efficiency of information transfer mediated by the  $\text{Ca}^{2+}$  increase, and clarify their mechanisms (see

Fig. 7). We defined the robustness as the unchanging distribution of the  $Ca^{2+}$  increase against the fluctuation of the PF input, which can be seen under the condition where extrinsic noise caused by the fluctuation of the PF input is much smaller than intrinsic noise caused by stochasticity in the  $Ca^{2+}$  increase. The robustness appears against much larger fluctuation of the PF input in the spine volume. We defined the sensitivity as the amplitude of the PF input giving the maximum of information transfer. In the spine volume, stochasticity makes the  $Ca^{2+}$  increase occur with a lower intensity of input, causing higher sensitivity to lower intensity of input. We defined the efficiency as how much information can be transferred by a unitary PF input. The volume-dependency of information transfer increases its efficiency in the spine volume. We found that the small-volume effect enables robust, sensitive, and efficient information transfer in the spine volume, but not in the cell volume. We propose that the small-volume effect is one of the functional reasons why the spine has to be so small.

## MATERIALS AND METHODS

### Simple stochastic model

The block diagram of the simple stochastic model is the same as that of the simple deterministic model (Fig. 1 E) (21). The inputs are *PF* and *CF*. After Fig. 3, we set *CF* = 0, and used only *PF* as the input. The output is *Ca*, which is the same as the output of the detailed stochastic model and remains the value of the number of the  $Ca^{2+}$  ion.

The total cytosolic  $Ca^{2+}$  in the spine of the Purkinje cell, *Ca*, is derived from the three pathways as follows:

$$Ca = Ca_{basal} + Ca_{VGCC} + Ca_{IP_3}, \quad (1)$$

where  $Ca_{basal}$ ,  $Ca_{VGCC}$ , and  $Ca_{IP_3}$  denote the basal cytosolic  $Ca^{2+}$ , the  $Ca^{2+}$  through the voltage-gated  $Ca^{2+}$  channel (VGCC) triggered by *CF*, and the  $Ca^{2+}$  through the  $IP_3$  receptors of the internal  $Ca^{2+}$  store triggered by *PF*, respectively.  $Ca_{basal}$  is constantly produced and described by the following:

$$\phi \xrightarrow{C_b/\tau_{FB}} Ca_{basal} \xrightarrow{1/\tau_{FB}} \phi, \quad (2)$$

where  $C_b/\tau_{FB}$  and  $1/\tau_{FB}$  denote the production and decay rate constants of  $Ca_{basal}$ , respectively. Hereafter,  $\phi$  denotes a fixed value.

$Ca_{VGCC}$  is triggered by *CF* and is described by the following:

$$CF \xrightarrow{1/\tau_{CF}} Ca_{VGCC} \xrightarrow{1/\tau_{CF}} \phi, \quad (3)$$

where  $1/\tau_{CF}$  denotes the production and decay rate constants of  $Ca_{VGCC}$ , respectively. *CF* is given by  $Amp_{PF} \times V$  at  $t = t_{CF}$ , with the volume of the system, *V*.

$Ca_{IP_3}$  is produced as follows. Briefly, *PF* produces  $IP_3$ . *Ca* has positive feedback (*FB*) through the activation of the  $IP_3$  receptor ( $G_{IP_3R}$ ).  $IP_3$  and  $G_{IP_3R}$  synergistically induce *Ca* release through  $IP_3R$  ( $Ca_{IP_3}$ ) and  $IP_3$  is triggered by *PF* as follows:

$$PF \xrightarrow{1/\tau_{PF}} IP_3 \xrightarrow{1/\tau_{PF}} \phi, \quad (4)$$

where  $1/\tau_{PF}$  denotes the production and decay rate constants of  $IP_3$ . *PF* is given by  $Amp_{PF} \times V$  at  $t = t_{CF}$ .

The time-delay variable *FB* is described by the following:

$$Ca \xrightarrow{1/\tau_{FB}} FB \xrightarrow{1/\tau_{FB}} \phi, \quad (5)$$

where  $1/\tau_{FB}$  denotes the production and decay rate constants of *FB*. This decay rate constant also determines the degradation rate of  $Ca_{IP_3}$ .

The  $IP_3$  receptor coupled with  $Ca^{2+}$ ,  $G_{IP_3R}$ , is mediated by the positive and negative feedback from *FB* and is given by the nonlinear function, described by the following:

$$G_{IP_3R} = Amp_{G_{IP_3R}} \left\{ \frac{k \times FB}{(k + FB)(K + FB)} \right\}^{n_{G_{IP_3R}}}, \quad (6)$$

where  $Amp_{G_{IP_3R}}$ , *k*, *K*, and  $n_{G_{IP_3R}}$  denote the amplitude of feedback, thresholds of *FB* for the positive and negative feedback, and nonlinearity of feedback, respectively.

The *Ca* released from  $IP_3R$ ,  $Ca_{IP_3}$ , is described by the following:

$$Ca_{IP_3} = IP_3 \times \frac{G_{IP_3R}}{V}. \quad (7)$$

These reactions are simulated by the use of Gillespie's method and the  $\tau$ -leap method (24). For example, in the reaction described by Eq. 3, the number of the  $Ca^{2+}$  from VGCC,  $Ca_{VGCC}(t + \tau)$ , is described as follows:

$$Ca_{VGCC}(t + \tau) = Ca_{VGCC}(t) + R_{in} - R_{out}, \quad (8)$$

where  $R_{in}$  and  $R_{out}$  indicate the number of reactions of inflow and outflow, which occur in the time interval between *t* and *t* +  $\tau$ , generated to obey the Poisson distribution,  $R_{in} \sim Poisson(CF \times \tau/\tau_{CF})$  and  $R_{out} \sim Poisson(Ca_{VGCC} \times \tau/\tau_{CF})$ , respectively. Similarly, the probability of reactions is based on the law of mass action. The appropriate  $\tau$  is calculated in accordance with by Gillespie et al. (25), which shows good approximation for first-order reactions.

Note that, under normal circumstances, the reactions by membrane molecules on the membrane, such as receptors, and those by cytosolic molecules, such as  $Ca^{2+}$  and  $IP_3$ , should be considered as separate mechanisms and compartments, which may be affected by the ratio between surface area and volume. In general, the surface area of the membrane is proportional to the order of the square of length, whereas the cell volume is proportional to the cube of that, which means that, as a system size increases, the increasing rate of the number of membrane molecules becomes smaller than that in the cytoplasm. Hence, in the cases of larger systems than the spine, the number of membrane molecules that can activate the cytosolic molecules is so small that most of substrates are not activated by the stimulation. Actually, when a volume was 8- or 125-fold larger than a spine volume, large  $Ca^{2+}$  increases did not occur any more at any *PF*-*CF* intervals. To uncover the simple influences of the smallness of a spine and the number of molecules, it is required that the effect of the stimulation to the cytosolic molecules through the membrane protein for a cell is the same as that for the spine. Therefore, we assumed that the number of membrane proteins is proportional to the volume, i.e., the cube of length, throughout this study.

We defined  $Ca_{res}$  as the area under the curve of the time course of  $Ca^{2+}$ , given by the following:

$$Ca_{res} = \int_T \{ [Ca](t) - C_b \} dt, \quad (9)$$

where  $C_b$  denotes the basal concentration of  $Ca^{2+}$ , which is 41.6 nM. Note that Koumura et al. (23) defined  $Ca_{res}$  as the logarithmic area under the curve, which is different from that in this study; however, the results of this study qualitatively show the same results.

The values of the parameters in the simple stochastic model are shown in Tables S1 and S2. The parameters excluding the following are the same as those of the simple deterministic model (23).

### Mutual information between PF- and CF-timing and $\text{Ca}^{2+}$ increase

We measured the input timing information coded by the  $\text{Ca}^{2+}$  response to mutual information between the  $\text{Ca}_{res}$  and the PF-CF timing interval  $\Delta t = t_{CF} - t_{PF}$ , given by the following:

$$I(\text{Ca}_{res}; \Delta t) = \int_{\Delta t} p_{in}(\tau) \times \left( \int_{\text{Ca}_{res}} p_c(c|\tau) \log_2 \frac{p_c(c|\tau)}{\int_{\Delta t} p_{in}(\tau) p_c(c|\tau) d\tau} dc \right) d\tau. \quad (10)$$

Here, the  $p_{in}(\Delta t)$  follows the uniform distribution. To remove the bias caused by the bin width of  $\text{Ca}_{res}$ , the mutual information was calculated by the method introduced by Cheong et al. (26). The mutual information remains almost constant for the bin width between  $10^{-2}$  and  $10^{-3.5}$  (pM min). Therefore, we fixed the bin width of  $\text{Ca}_{res}$  as  $10^{-2}$  (pM min) in the analysis and for drawing the histogram.

We also measured the information coded by the probability of the large  $\text{Ca}^{2+}$  increase and by the amplitude of the  $\text{Ca}^{2+}$  increase, denoted as the mutual information of the probability component and of the amplitude component, respectively. We defined  $\theta$  as the  $\text{Ca}_{res}$  representing the local minimum value of the marginal distribution  $p_c(\text{Ca}_{res})$  (Fig. 1 F) and  $s$  as the logical value, whether  $\text{Ca}_{res} > \theta$  is satisfied or not.

The mutual information coded with the probability component, which indicates the information transfer coded by the probability whether the large  $\text{Ca}^{2+}$  increase occurs or not, is defined as follows:

$$I_{prob}(\text{Ca}_{res}; \Delta t) = \int_{\Delta t} p_{in}(\tau) \times \left( \int_{\text{Ca}_{res}} p_c(c|\tau) \log_2 \frac{p_c(c|\tau)}{p_{-prob}(c|\tau)} dc \right) d\tau, \quad (11)$$

The mutual information coded by the amplitude component, which indicates the information transfer coded by the amplitude of the  $\text{Ca}^{2+}$  increase, is defined as follows:

$$I_{amp}(\text{Ca}_{res}; \Delta t) = \int_{\Delta t} p_{in}(\tau) \times \left( \int_{\text{Ca}_{res}} p_c(c|\tau) \log_2 \frac{p_c(c|\tau)}{p_{-amp}(c|\tau)} dc \right) d\tau, \quad (13)$$

and

$$p_{-amp}(\text{Ca}_{res} | \Delta t) = \sum_{s \in \{0,1\}} P(s|\Delta t) p_c(\text{Ca}_{res} | s), \quad (14)$$

where  $p_{-amp}(\text{Ca}_{res} | \Delta t)$  denotes the distribution of  $\text{Ca}_{res}$  without the amplitude component, which was calculated by marginalizing  $\Delta t$  out of the amplitude component  $P(s|\Delta t)$  in  $p_c(\text{Ca}_{res} | \Delta t)$ . This information satisfies the following:

$$I(\text{Ca}_{res}; \Delta t) = I_{prob}(\text{Ca}_{res}; \Delta t) + I_{amp}(\text{Ca}_{res}; \Delta t). \quad (15)$$

Note that  $I_{prob}$  mathematically indicates the information transfer coded by the probability of the large  $\text{Ca}^{2+}$  increase, i.e., the probability component, whereas  $I_{amp}$  actually indicates the information transfer coded by other than the probability of the large  $\text{Ca}^{2+}$  increase, including the amplitude of the  $\text{Ca}^{2+}$  increase, i.e., the amplitude component. However, the amplitude component seems to be dominant component in that expect for the probability component. Thus, we defined  $I_{prob}$  and  $I_{amp}$  as the information coded with probability and amplitude components, respectively.

### Mutual information between the amplitude of PF input and $\text{Ca}^{2+}$ increase

We also calculated the mutual information between  $\text{Ca}_{res}$  and  $\text{Amp}_{PF}$  by assuming the input distribution as the Gaussian distribution with  $\mu_s$ , the average, and  $STD$ , the SD, given by the following:

$$I(\text{Ca}_{res}; \text{Amp}_{PF}) = \int_{\text{Amp}_{PF}} p_s(a|\mu_s, STD) \left( \int_{\text{Ca}_{res}} p_c(c|a) \log_2 \frac{p_c(c|a)}{\int_{\text{Amp}_{PF}} p_s(a|\mu_s, STD) p_c(c|a) da} dc \right) da \quad (16)$$

and

$$p_{-prob}(\text{Ca}_{res} | \Delta t) = \sum_{s \in \{0,1\}} P(s) p_c(\text{Ca}_{res} | s, \Delta t), \quad (12)$$

where  $p_{-prob}(\text{Ca}_{res} | \Delta t)$  denotes the distribution of  $\text{Ca}_{res}$  without the probability component, which was calculated by marginalizing  $\Delta t$  out of the probability component  $P(s|\Delta t)$  in  $p_c(\text{Ca}_{res} | \Delta t)$ .

where

$$p_s(\text{Amp}_{PF} | \mu_s, STD) = \frac{1}{\sqrt{2\pi} STD} \exp \left[ -\frac{(\text{Amp}_{PF} - \mu_s)^2}{2 STD^2} \right]. \quad (17)$$

Note that below in Results, we defined  $p_a$  as the probability density distribution of the PF input fluctuation and is assumed as a Gaussian distribution.

Therefore,  $p_s$  and  $p_a$  have  $Amp_{PF}$  as the variable and are assumed as a Gaussian distribution. However, these distributions mean different features:  $p_s$  means the input distribution of the mutual information, and  $p_a$  means the distribution of amplitude of the PF input under the fluctuation of amplitude of the PF input.

## Fitted function of the volume-dependency of mutual information

The mutual information per the PF input against the volume was fitted by the functions  $a \log_2(b + c \times V)$  and  $1/2 \log_2(1 + c \times V)/V$  (see Fig. 6 B) by using of the nonlinear least squares method with the Marquadt-Levenberg algorithm. We obtained the fitting line,  $a \log_2(b + c \times V)$ , with the best fit of  $a = 0.3924651$ ,  $b = 1.049141$ , and  $c = 1.330285$  and the channel capacity of the Gaussian channel,  $1/2 \log_2(1 + c \times V)$ , with the best fit parameter of  $c = 0.5128671$ .

## RESULTS

### Development of the simple stochastic model

To reduce the complexity and computational cost of the detailed stochastic model (23), we constructed the simple stochastic model based on the simple deterministic model (Fig. 1 D) (21). We set the parameters according to the PF and CF inputs of the simple deterministic model to reproduce the PF- and CF-timing dependent  $Ca^{2+}$  responses of the detailed stochastic model (23) (Fig. 1; see Materials and Methods; Tables S1 and S2). Thereafter, we denoted  $10^{-1} \mu m^3$  as the spine volume, and  $10^3 \mu m^3$  as the cell volume. In the spine volume, coincident PF and CF inputs with  $\Delta t = 100$  ms induced a large  $Ca^{2+}$  increase (Fig. 1 E, red), but they sometimes failed to induce a large  $Ca^{2+}$  increase (Fig. 1 E, blue). We defined  $Ca_{res}$  as the temporal integration of the  $Ca^{2+}$  concentration, subtracted by the basal  $Ca^{2+}$  concentration. The distribution of  $Ca_{res}$  showed a bimodal distribution (Fig. 1 F). The distribution of  $Ca_{res}$  always showed a bimodal distribution regardless of the timing between the PF and CF inputs, and probability of a large  $Ca^{2+}$  increase changed depending on the timing between the PF and CF inputs (Fig. 1 G). We divided the distribution of  $Ca_{res}$  into the probability component (Fig. 1 H) and the amplitude component (Fig. 1 I) (see Materials and Methods). The probability component, but not the amplitude component, showed a bell-shaped time window, indicating that the timing information between the PF and CF inputs is coded by the probability of a large  $Ca^{2+}$  increase, rather than by the amplitude of the  $Ca^{2+}$  increase in the spine volume. In contrast, in the cell volume, the coincident PF and CF inputs with  $\Delta t = 100$  ms always induced a large  $Ca^{2+}$  increase without failure (Fig. 1 J) and  $Ca_{res}$  showed a unimodal distribution (Fig. 1 K) (see Materials and Methods). The distribution of  $Ca_{res}$  always showed a unimodal distribution regardless of the timing between the PF and CF inputs (Fig. 1 L), and only the amplitude of  $Ca_{res}$  (Fig. 1 N), not the probability (Fig. 1 M), showed a bell-shaped time window, indicating that the timing information between the PF and CF inputs

is coded by the amplitude of the  $Ca^{2+}$  increase, rather than the probability of a large  $Ca^{2+}$  increase in the cell volume. These results are consistent with our previous study using the detailed stochastic model (23).

The simple stochastic model also showed similar properties, such as efficiency, robustness, and sensitivity in the detailed stochastic model (Fig. 2; see Fig. S2). Mutual information is a nonlinear measure of correlation that takes into account entire probability distributions rather than simply second-order correlations, and a quantitative measure of how much information is transferred from input to output (27). We used mutual information as a measure of how much information is transferred from the PF- and CF-timing to  $Ca_{res}$ . The mutual information between the PF- and CF-timing and  $Ca_{res}$  increased with the increase in volume (Fig. 2 A). In the spine volume, the probability component of the mutual information was larger than the amplitude component of the mutual information (Fig. 2 A, inset), and the amplitude component of the mutual information became larger than the probability component of the mutual information with increase in the volume. Mutual information per volume became highest at the spine volume, and it decreased with the increase in volume (Fig. 2 B), indicating that the most-efficient information coding per volume is achieved at the spine volume. In the spine volume, the mutual information did not decrease; it remained constant regardless of the coefficient of variation (CV) of the PF input (Fig. 2 C, black line), whereas that in the cell volume decreased with the increase in CV of the PF input (Fig. 2 C, yellow line; see Fig. S1), indicating that the information

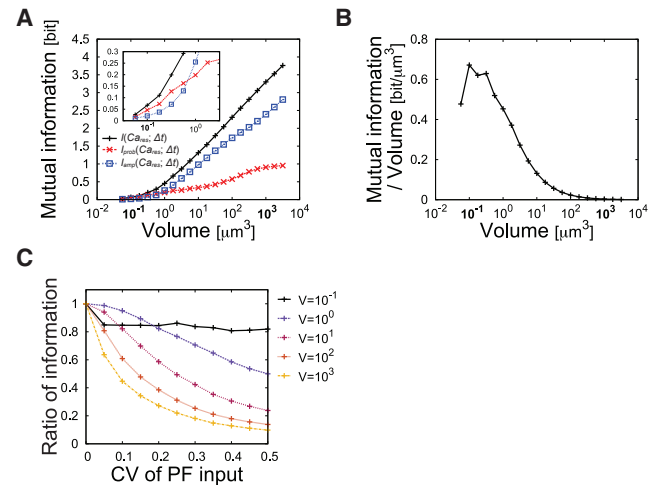

FIGURE 2 The efficient and robust features in the simple stochastic model. (A) The volume-dependency of the mutual information between the PF- and CF-timing and  $Ca_{res}$  is provided. Black, red, and blue lines indicate the mutual information of the total distribution of  $Ca_{res}$ , of the probability component, and of the amplitude component, respectively. (B) The volume-dependency of the mutual information per volume. (C) CV of amplitude of the PF input-dependency of the mutual information. The ratio of information was obtained by setting mutual information with CV = 0 for each volume at 1. To see this figure in color, go online.

transfer by  $Ca_{res}$  is robust against fluctuation of the PF input in the spine volume only, but not in the larger volume including the cell volume. The detailed stochastic model showed higher sensitivity to the lower numbers of the PF input in the spine volume rather than that in the cell volume (see Fig. S2 D) (23). We showed that the higher sensitivity to lower PF input can be seen in the spine volume, but not in the larger volume including the cell volume (see below). These results of the simple stochastic model are also consistent with those of the detailed stochastic model (see Fig. S2) (23).

These results indicate that the simple stochastic model can retain the essential properties of the  $Ca^{2+}$  response, such as robust, sensitive, and efficient features. Using this simple stochastic model, we next defined the robustness, sensitivity, and efficiency, and clarified their mechanisms in the spine volume.

### The mechanism of robustness

In this section, we define the robustness and clarify the mechanism of the robustness. The amplitudes of the  $Ca^{2+}$  increase by conjunctive PF and CF inputs is compatible with those by strong PF input alone (see Fig. S3 K) (20). Consistently, strong PF input alone has experimentally been shown to induce a large  $Ca^{2+}$  increase (28). Therefore, we hereafter used the PF input alone for simplicity. First, we showed that robustness is provided by the unchanging distribution of  $Ca_{res}$  against the fluctuation of the PF input. We obtained the necessary and sufficient condition for robustness, where the intrinsic noise is much larger than the extrinsic noise. We showed that the range of the PF input fluctuation satisfying the conditions for robustness is much larger in the spine volume than in the cell volume, indicating that the distribution of  $Ca_{res}$  against the fluctuation of the PF input in the spine volume is more robust than in the cell volume against the fluctuation of the PF input.

Hereafter, we used only the PF input alone instead of PF and CF inputs.  $Amp_{PF}$ , the amplitude of the PF input, was set to be between 150 and 215 because the range of amplitude of the PF input alone corresponds to the range of amplitude of the PF- and CF-timing dependent inputs (see Fig. S3 K). Therefore, with the appropriate distribution of the PF input as the input distribution of the amplitude of the PF input, the mutual information between the PF- and CF-timing interval and  $Ca_{res}$  could be calculated from the  $Amp_{PF}$ -dependent distributions of the  $Ca_{res}$ . We performed the stochastic simulation  $10^4$  times per each amplitude of the PF input, which is defined as  $Amp_{PF}$ , and obtained  $p_c(Ca_{res}|Amp_{PF})$ , the probability density distribution of  $Ca_{res}$ . Using  $p_c(Ca_{res}|Amp_{PF})$ , we examined the mechanism of robustness. In the spine volume, the distribution of  $Ca_{res}$ ,  $p_c(Ca_{res}|Amp_{PF})$ , became bimodal when  $Amp_{PF}$  exceeded  $\sim 50$  (Fig. 3 A; Fig. S3,

A and B). In contrast, in the cell volume, the distribution of  $Ca_{res}$  always showed unimodal distribution regardless of  $Amp_{PF}$ , and its average monotonically increased along  $Amp_{PF}$  when  $Amp_{PF}$  exceeded  $\sim 150$  (Fig. 3 B; Fig. S3, I and J).

*The robustness is given by the unchanging distribution of  $Ca_{res}$  against the fluctuation of PF input*

We have shown that the distribution of  $Ca_{res}$  for each  $\Delta t$  was unchanged regardless of CV of the PF input in the spine volume, but not in the cell volume (see Fig. S1) (23), suggesting that the unchanging distribution of  $Ca_{res}$  against the fluctuation of the PF input is a key to the robustness of the information transfer. Therefore, we examined whether the distribution of  $Ca_{res}$  with the PF input alone is also unchanged regardless of CV of the PF input in the spine volume, but not in the cell volume.

Experimentally, it has been reported that the distribution of the amplitude of the PF input in the Purkinje cell can be approximated by a Gaussian distribution (11). We set  $p_a(Amp_{PF} | \mu_a, \sigma_a)$ , the probability density distribution of  $Amp_{PF}$ , as the Gaussian distribution given by  $\mathcal{N}(Amp_{PF} | \mu_a, \sigma_a^2)$ , where  $\mu_a$  and  $\sigma_a$  denote the average of  $Amp_{PF}$  and the SD of  $Amp_{PF}$ , respectively. We used  $\sigma_a$ , the SD of  $Amp_{PF}$ , as the magnitude of fluctuation of  $Amp_{PF}$  because the  $\sigma_a$  is proportional to  $CV_a$ , the CV of  $Amp_{PF}$ , with the fixed  $\mu_a$ , given by  $CV_a = \sigma_a/\mu_a$ . When the PF input is given by  $p_a(Amp_{PF} | \mu_a, \sigma_a)$ ,  $p_{ac}(Ca_{res} | \mu_a, \sigma_a)$ , the distribution of  $Ca_{res}$  with the fluctuation of  $Amp_{PF}$ , is given by the following:

$$\begin{aligned} p_{ac}(Ca_{res} | \mu_a, \sigma_a) &= \int_{Amp_{PF}} p_a(a | \mu_a, \sigma_a) p_c(Ca_{res} | a) da \\ &= \int_{Amp_{PF}} \mathcal{N}(a | \mu_a, \sigma_a^2) p_c(Ca_{res} | a) da, \end{aligned} \quad (18)$$

where  $p_c(Ca_{res}|a)$  for each  $a \in Amp_{PF}$ , i.e.,  $p_c(Ca_{res}|Amp_{PF})$ , was obtained by the stochastic simulation. In the spine volume, the distributions of  $Ca_{res}$  always exhibited similar bimodal distributions regardless of  $CV_a$  and did not change even if the  $CV_a$  became larger (Fig. 3, C–E). In contrast, in the cell volume, the distributions of  $Ca_{res}$  exhibited unimodal distribution with  $CV_a = 0$ ; with the increase in  $CV_a$ , the distributions of  $Ca_{res}$  changed and became bimodal (Fig. 3, F–H). These properties remained the same regardless of  $\mu_a$ , the average of  $Amp_{PF}$  (see Fig. S4). Similar results were obtained when both PF and CF inputs were used (see Fig. S1).

Taken together, in the spine volume, the distribution of  $Ca_{res}$  remained almost unchanged against the fluctuation of  $Amp_{PF}$ , whereas, in the cell volume, the distribution of  $Ca_{res}$  largely varied against the fluctuation of  $Amp_{PF}$ . These results indicate that the unchanging distribution of  $Ca_{res}$  against the fluctuation of  $Amp_{PF}$  causes robustness. Note

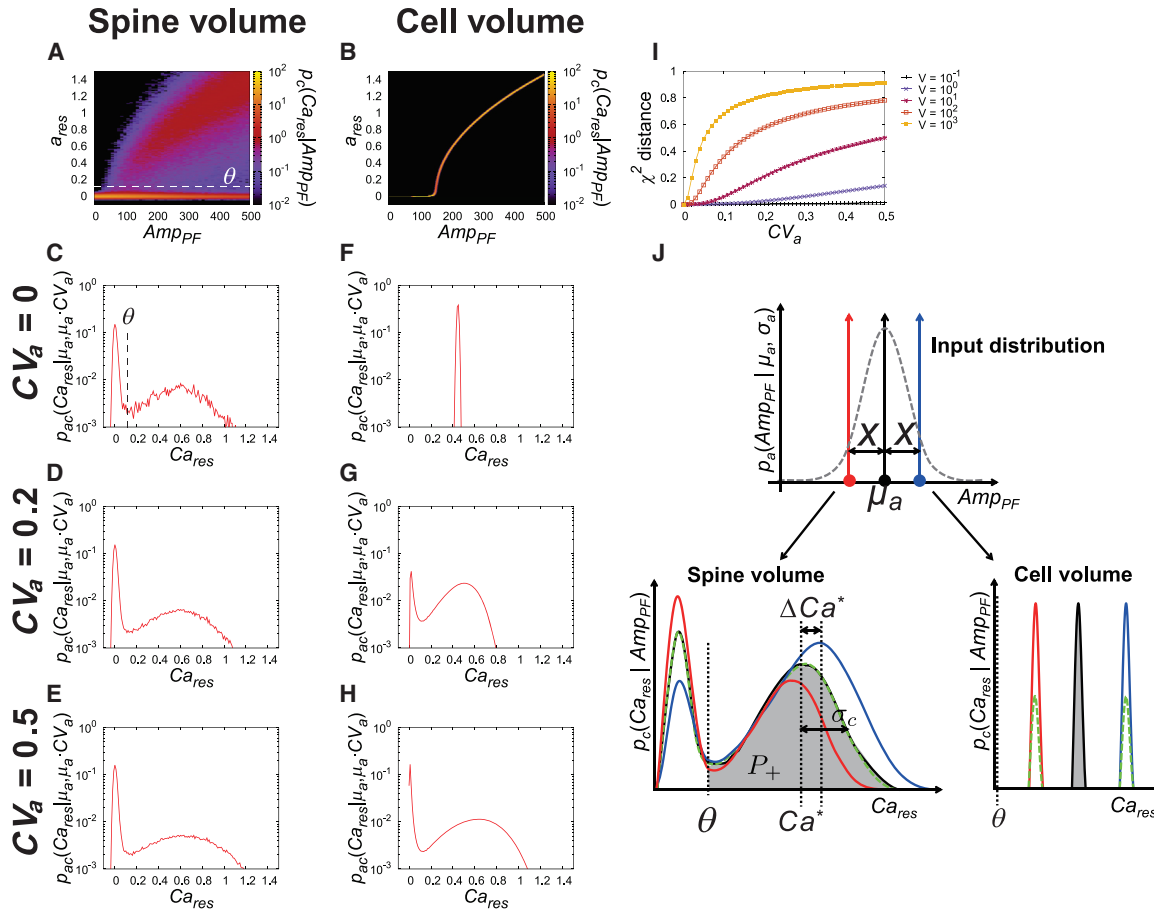

FIGURE 3 Unchanging distributions of  $Ca_{res}$  against fluctuation of the PF input gives robustness in the spine volume. The  $Amp_{PF}$ -dependency of  $p_c(Ca_{res} | Amp_{PF})$  and the distributions of  $Ca_{res}$  in the spine volume (A) and in the cell volume (B) are shown. (C–H) The distributions of  $Ca_{res}$  against the PF input fluctuation with the indicated  $CV_a$  with  $\mu_a = 180$  in the spine volume (C–E) and in the cell volume (F–H), respectively, are shown.  $\theta$  indicates the threshold dividing the distribution into the ranges with large  $Ca_{res}$  and with small  $Ca_{res}$  (see Fig. S1). (I) The  $CV_a$ -dependency of  $\chi^2$  distance of distributions between  $p_{ac}(Ca_{res} | \mu_a, \mu_a \times CV_a)$  and  $p_{ac}(Ca_{res} | \mu_a, \mu_a)$  with  $\mu_a = 180$ . (J) The input distribution of  $Amp_{PF}$  is given by the Gaussian distribution  $\mathcal{N}(\mu_a, \sigma_a^2)$ . The distribution of  $Ca_{res}$  with  $Amp_{PF} = \mu_a$  (black),  $Amp_{PF} = \mu_a + x$  (blue), and  $Amp_{PF} = \mu_a - x$  (red) in the spine volume (left) and in the cell volume (right). The averaged distribution with  $Amp_{PF} = \mu_a + x$  and with  $Amp_{PF} = \mu_a - x$  (green). To see this figure in color, go online.

that, in general, the robustness appears not only when the distribution of output does not change by the fluctuation, but also when the distribution drastically changes if the same mutual information can be represented by completely different distributions. However, in the biological systems, it is reasonable to assume that the distribution of the output continuously changes and varies with the increase in the fluctuation of input. Therefore, we did not consider the latter case but considered the robustness only with the unchanging distribution of  $Ca_{res}$  against the fluctuation of  $Amp_{PF}$ .

We quantitated the change of the distributions of  $Ca_{res}$  with the increase in  $CV_a$  by the  $\chi^2$  distance against the distributions of  $Ca_{res}$  with  $CV_a = 0$ . Note that, in general, the distance between two distributions is calculated by other distance functions, such as KL-divergence, Hellinger distance, etc. However, the  $\chi^2$  distance can also reproduce the distance between two distributions, does not diverge,

and clearly shows whether the distributions are the same or not. The  $\chi^2$  distance becomes 0 when the distribution of  $Ca_{res}$  with  $CV_a$  is the same as that with  $CV_a = 0$ , and the  $\chi^2$  distance becomes 1 when two distributions are completely different. In the spine volume, the  $\chi^2$  distance remained almost 0 regardless of  $CV_a$ , whereas in the cell volume the  $\chi^2$  distance abruptly increased with the increase in  $CV_a$  and became close to 1 (Fig. 3 I), indicating that the distribution of  $Ca_{res}$  in the spine volume does not change with the increase in  $CV_a$  but that in the cell volume largely changes even with a small increase in  $CV_a$ . This is the reason why the robustness can be seen only in the spine volume but not in the cell volume.

#### The necessary and sufficient condition for the robustness

Next, we clarified how the distribution of  $Ca_{res}$  in the spine volume does not change with the increase in  $CV_a$ , and how that in the cell volume largely changes even with a small

increase in  $CV_a$ . We obtained the necessary and sufficient conditions for robustness: unchanging distribution of  $Ca_{res}$  regardless of  $CV_a$ . We considered  $p_{ac}(Ca_{res} | \mu_a, \sigma_a)$ , the distribution of  $Ca_{res}$  with the fluctuation of  $Amp_{PF}$ , with the increase in  $CV_a$ . Note that  $CV_a = \sigma_a/\mu_a$ . Because  $\mathcal{N}(Amp_{PF} | \mu_a, \sigma_a^2)$  is symmetric with respect to  $\mu_a$ , i.e.,  $\forall a \in Amp_{PF}$ ,  $\mathcal{N}(a | \mu_a, \sigma_a^2) = \mathcal{N}(2\mu_a - a | \mu_a, \sigma_a^2)$ , Eq. 18 was changed as follows:

$$\begin{aligned}
 p_{ac}(Ca_{res} | \mu_a, \sigma_a) &= \int_{\mu_a}^{\infty} \mathcal{N}(a | \mu_a, \sigma_a^2) p_c(Ca_{res} | a) da + \int_{-\infty}^{\mu_a} \mathcal{N}(a | \mu_a, \sigma_a^2) p_c(Ca_{res} | a) da \\
 &= \int_{\mu_a}^{\infty} \mathcal{N}(a | \mu_a, \sigma_a^2) p_c(Ca_{res} | a) da + \int_{\mu_a}^{\infty} \mathcal{N}(2\mu_a - a | \mu_a, \sigma_a^2) p_c(Ca_{res} | 2\mu_a - a) da \\
 &= \int_{\mu_a}^{\infty} [\mathcal{N}(a | \mu_a, \sigma_a^2) p_c(Ca_{res} | a) + \mathcal{N}(a | \mu_a, \sigma_a^2) p_c(Ca_{res} | 2\mu_a - a)] da \\
 &= \int_{\mu_a}^{\infty} \mathcal{N}(a | \mu_a, \sigma_a^2) [p_c(Ca_{res} | a) + p_c(Ca_{res} | 2\mu_a - a)] da.
 \end{aligned} \tag{19}$$

Because the distribution of  $Amp_{PF}$  is the Gaussian distribution,  $\mathcal{N}(Amp_{PF} | \mu_a, \sigma_a^2)$ , the probability density of  $Amp_{PF} = a$  decreases as the difference between  $a$  and  $\mu_a$  becomes larger. In particular, the probability that  $Amp_{PF} = a$  is included in the range  $\mu_a - 3\sigma_a \leq a \leq \mu_a + 3\sigma_a$  is given by  $\int_{\mu_a - 3\sigma_a}^{\mu_a + 3\sigma_a} \mathcal{N}(a | \mu_a, \sigma_a^2) da = 0.9974\dots$ , i.e., almost 1. Thus, the probability of  $a > \mu_a + 3\sigma_a$  or  $a < \mu_a - 3\sigma_a$  is quite small and almost negligible. Therefore, satisfying Eq. 19 in the range  $\mu_a - 3\sigma_a \leq a \leq \mu_a + 3\sigma_a$  is enough to satisfy Eq. 19 for almost all ranges of  $Amp_{PF}$ . This means that right side of Eq. 19 in the range  $a > \mu_a + 3\sigma_a$  can be neglected, and  $p_{ac}(Ca_{res} | \mu_a, \sigma_a)$  is given by the following:

$$\begin{aligned}
 p_{ac}(Ca_{res} | \mu_a, \sigma_a) &= \int_{\mu_a}^{\mu_a + 3\sigma_a} \mathcal{N}(a | \mu_a, \sigma_a^2) [p_c(Ca_{res} | a) \\
 &\quad + p_c(Ca_{res} | 2\mu_a - a)] da.
 \end{aligned} \tag{20}$$

Here, we considered the case whereby the averaged distribution between the distributions of  $Ca_{res}$  with the  $Amp_{PF} = a$  shifted  $|a - \mu_a|$  from  $\mu_a$ , the average of  $Amp_{PF}$ , i.e.,  $1/2[p_c(Ca_{res} | a) + p_c(Ca_{res} | 2\mu_a - a)]$ , is almost the same as the distribution of  $Ca_{res}$  with  $Amp_{PF} = \mu_a$ ,  $p_c(Ca_{res} | \mu_a)$  up to  $a = \mu_a + 3\sigma_a$ , given by the following:

$$\begin{aligned}
 \forall a < \mu_a + 3\sigma_a : p_c(Ca_{res} | \mu_a) &\simeq \frac{1}{2} [p_c(Ca_{res} | a) \\
 &\quad + p_c(Ca_{res} | 2\mu_a - a)].
 \end{aligned} \tag{21}$$

When the conditions where Eq. 21 is satisfied, we obtained the condition where  $p_{ac}(Ca_{res} | \mu_a, \sigma_a)$ , the distribution of  $Ca_{res}$  with the fluctuation of  $Amp_{PF}$ , does not change regarding  $\sigma_a$ , the magnitude of fluctuation of  $Amp_{PF}$ . This condition means that the distribution of  $Ca_{res}$  remained the same with fluctuation of  $Amp_{PF}$ . Substituting Eq. 21 for Eq. 20, we obtained the following:

$$\begin{aligned}
 p_{ac}(Ca_{res} | \mu_a, \sigma_a) &\simeq 2 \int_{\mu_a}^{\mu_a + 3\sigma_a} \mathcal{N}(a | \mu_a, \sigma_a^2) p_c(Ca_{res} | \mu_a) da \\
 &= 2 p_c(Ca_{res} | \mu_a) \int_{\mu_a}^{\mu_a + 3\sigma_a} \mathcal{N}(a | \mu_a, \sigma_a^2) da \\
 &\simeq p_c(Ca_{res} | \mu_a).
 \end{aligned} \tag{22}$$

The left side of Eq. 22 indicates the distribution of  $Ca_{res}$  with fluctuation of  $Amp_{PF}$ . The left side is almost the same with the right side of the equation, which is the distribution of  $Ca_{res}$  without fluctuation of  $Amp_{PF}$ . Note that  $\sigma_a$  does not directly appear in Eq. 21; however,  $\sigma_a$  determines the upper bound of the range of  $a - \mu_a$  satisfying Eq. 21. This means that if Eq. 22 is satisfied for  $\sigma_a = \sigma_a^*$ , then Eq. 22 is also satisfied for  $\sigma_a < \sigma_a^*$ . Namely, the upper bound of range  $a - \mu_a$  satisfying Eq. 21 is larger, and Eq. 22 is satisfied for larger  $\sigma_a$ , i.e.,  $CV_a$ . Therefore, Eq. 21 is the condition sufficient to allow the distribution of  $Ca_{res}$  not to change against the fluctuation of  $Amp_{PF}$ .

Taken together, Eq. 21 is a necessary and sufficient condition in which the distribution of  $Ca_{res}$  remains the same against the fluctuation of  $Amp_{PF}$ . If  $a - \mu_a$ , the effective  $Amp_{PF}$  with fluctuation of  $Amp_{PF}$ , satisfying Eq. 21 is larger, then the distribution of  $Ca_{res}$  does not change, even with the larger fluctuation of  $Amp_{PF}$ . Therefore, the upper bound of range  $a - \mu_a$  satisfying Eq. 21 determines the maximum of  $\sigma_a$ , where the distribution of  $Ca_{res}$  does not change. Next, we examined the upper bounds of range  $a - \mu_a$  satisfying Eq. 21 in the spine volume and in the cell volume. We also demonstrated that the upper bound of range  $a - \mu_a$



satisfying Eq. 21 in the spine volume is much larger than that in the cell volume; therefore, information transfer by  $Ca_{res}$  in the spine volume is much more robust than that in the cell volume against fluctuation of  $Amp_{PF}$ .

*The necessary and sufficient condition for robustness are satisfied in the range in which the intrinsic noise is larger than the extrinsic noise*

We next show that the upper bound of the range of  $Amp_{PF}$  satisfying Eq. 21 is determined by the upper bound of the range of  $Amp_{PF}$ , where the intrinsic noise is larger than the extrinsic noise. We first provide an intuitive interpretation of this proposition using schematic representation of the distribution of  $Ca_{res}$  with the indicated  $Amp_{PF}$  in the spine volume and cell volume (Fig. 3 J; see Fig. S3), which then we prove. The distribution of  $Ca_{res}$  in the spine volume is divided into two distributions by threshold  $\theta$  (Fig. 3 J; see Fig. S3). Note that because of the unimodal distribution of  $Ca_{res}$  in the cell volume, we set  $\theta = -\infty$  in the cell volume. This means that Eq. 21 was divided into the forms given by the following:

$$p_c(Ca_{res} | Amp_{PF}) = P_+(Amp_{PF})p_c(Ca_{res} | Ca_{res} > \theta, Amp_{PF}) + P_-(Amp_{PF})p_c(Ca_{res} | Ca_{res} \leq \theta, Amp_{PF}), \quad (23)$$

and

$$\begin{cases} P_+(Amp_{PF}) \equiv \int_{\theta}^{\infty} p_c(c | Amp_{PF}) dc \\ P_-(Amp_{PF}) \equiv \int_{-\infty}^{\theta} p_c(c | Amp_{PF}) dc \end{cases}, \quad (24)$$

where  $P_+$  and  $P_-$  denote the probabilities of  $Ca_{res} > \theta$  and  $Ca_{res} \leq \theta$  with  $Amp_{PF} = a$ , respectively. We separately considered the first term and second term of the right side. It should be noted that because  $\theta$  in the cell volume was set at  $-\infty$ ,  $P_+$  in the cell volume is always 1 for any  $Amp_{PF}$ . Furthermore, we defined  $x = Amp_{PF} - \mu_a$ , the relative amplitude of the PF input, as the difference of  $Amp_{PF}$  compared with  $\mu_a$ , the average of  $Amp_{PF}$ . Then, Eqs. 21 and 23 were rewritten, respectively, as follows:

$$p_c(Ca_{res} | \mu_a) = \frac{1}{2} [p_c(Ca_{res} | \mu_a + x) + p_c(Ca_{res} | \mu_a - x)] \quad (25)$$

and

$$p_c(Ca_{res} | \mu_a + x) = P_+(\mu_a + x)p_c(Ca_{res} | Ca_{res} > \theta, \mu_a + x) + P_-(\mu_a + x)p_c(Ca_{res} | Ca_{res} \leq \theta, \mu_a + x). \quad (26)$$

In the spine volume, the distributions of  $Ca_{res}$  above the threshold  $\theta$  with  $Amp_{PF} = \mu_a + x$  (Fig. 3 J, blue in the left

panel) and with  $Amp_{PF} = \mu_a - x$  (Fig. 3 J, left panel, red line) had  $\sigma_c(\mu_a \pm x)$ , the SD of  $Ca_{res}$ , which is larger than  $\Delta Ca^*$ , the gap of the mode of the distribution of  $Ca_{res}$ , and these distributions widely overlapped each other. Then, the averaged distribution of these two distributions of  $Ca_{res}$  with  $Amp_{PF} = \mu_a \pm x$  became the unimodal and intermediate distribution (Fig. 3 J, green dashed line in left panel), and became almost the same as the distribution of  $Ca_{res}$  above threshold  $\theta$  with  $Amp_{PF} = \mu_a$  (Fig. 3 J, black line in the left panel). Also, the distributions of  $Ca_{res}$  below threshold  $\theta$  exhibited similar unimodal distribution. Thus, the averaged distribution of these two distributions below threshold  $\theta$  (Fig. 3 J, green dashed line in left panel) became almost the same as the distribution of  $Ca_{res}$  below the threshold  $\theta$  with  $Amp_{PF} = \mu_a$  (Fig. 3 J, black line in left panel). Therefore, in the spine volume, for the distributions of  $Ca_{res}$  above and below the threshold  $\theta$ , the averaged distributions of the distributions of  $Ca_{res}$  with  $Amp_{PF} = \mu_a \pm x$  were the same as that with  $Amp_{PF} = \mu_a$ , indicating that Eq. 21 is satisfied. This also means that any symmetrical distribution of  $x$  other than the Gaussian distribution can give the same result. In contrast, in the cell volume, the distributions of  $Ca_{res}$  with  $Amp_{PF} = \mu_a + x$  (Fig. 3 J, red line in right panel) and  $Amp_{PF} = \mu_a - x$  (Fig. 3 J, blue line in right panel) had the SDs that are smaller than  $\Delta Ca^*$ , the gap of the mode of the distribution of  $Ca_{res}$ , and did not overlap each other. Then, the averaged distribution of these two distributions (Fig. 3 J, green dashed line in right panel) became bimodal and did not conform to the distribution of  $Ca_{res}$  with  $Amp_{PF} = \mu_a$  (Fig. 3 J, black line in right panel), indicating that Eq. 21 is not satisfied. Therefore, the symmetry of the distribution of  $Amp_{PF}$  and large  $\sigma_c$ , the SDs of the distribution of  $Ca_{res}$ , in comparison with  $\Delta Ca^*$ , the gap of the mode of the distribution of  $Ca_{res}$ , can provide conformation to the averaged distribution of the two distributions of  $Ca_{res}$  with  $Amp_{PF} = \mu_a \pm x$  to the distribution with  $Amp_{PF} = \mu_a$ . Then, we proved this proposition. For this purpose, we derived the upper bound of the range of  $x$  where Eq. 21 is satisfied, and showed that this upper bound in the spine volume is larger than that in the cell volume.

We examined Eq. 21 as satisfied when  $\sigma_c$ , the SD of  $Ca_{res}$ , is larger than  $\Delta Ca^*$ ; the gap of  $Ca^*$ , the mode of the distribution of  $Ca_{res}$ ; with  $Amp_{PF} = \mu_a + x$  and  $Amp_{PF} = \mu_a - x$  (see Supporting Material). We approximately showed that, if  $Ca^*$  and  $P_+$  linearly increase with the increase in  $Amp_{PF}$ , when  $\Delta Ca^* \ll \sigma_c$ , then Eq. 21 was satisfied. This means that the necessary and sufficient condition for robustness is satisfied in the range where the intrinsic noise,  $\sigma_c$ , is larger than the extrinsic noise,  $\Delta Ca^*$ .

*The range of the fluctuation of PF input satisfying the conditions for robustness is larger in the spine volume than in the cell volume*

We next examined the range of the fluctuation of the PF input satisfying the condition for robustness. In the spine

volume in the range considered ( $150 \leq Amp_{PF} \leq 215$ ),  $Ca^*$  and  $P_+$  always linearly increase with the increase in  $Amp_{PF}$ . Thus, the range of  $Amp_{PF}$  where the distribution of  $Ca_{res}$  remains the same regardless of  $CV_a$  in the spine volume was determined by the range satisfying  $\Delta Ca^* \ll \sigma_c$ . In the spine volume,  $\Delta Ca^*/\sigma_c \ll 1$  when  $x$  was small and  $\Delta Ca^*/\sigma_c$  increased with the increase in  $x$ , and exceeded 1 at  $x = 110$  (Fig. 4 A). In contrast, in the cell volume,  $\Delta Ca^*/\sigma_c$  exceeded 1 even at  $x = 2$  (Fig. 4 B). We defined  $\delta_{max}$  as  $x$  that gives  $\Delta Ca^*/\sigma_c = 1$ .  $\delta_{max}$  relatively provides the upper bound of  $x$  where  $\Delta Ca^*/\sigma_c \ll 1$ . Thus, we used  $\delta_{max}$  as the index of the range of  $x$  for robustness (Fig. 4 C). The larger  $\delta_{max}$  means more robustness.  $\delta_{max}$  was highest at the spine volume and decreased with the increase in volume (Fig. 4 C), indicating that the spine volume gives the highest robustness. Because  $\delta_{max}$  in the spine volume was much larger than that in the cell volume, the upper bound of  $x$  where  $\Delta Ca^*/\sigma_c \ll 1$  in the spine volume is much larger than that in the cell volume. Here,  $x$  denoted the relative amplitude of the PF input as the displacement of  $Amp_{PF}$  from  $\mu_a$ , the average of  $Amp_{PF}$ , given by  $x = Amp'_{PF} = Amp_{PF} - \mu_a$ , i.e., a larger  $x$  corresponds to a larger  $CV_a$ . Therefore, in the spine volume, in the range  $150 < Amp_{PF} \leq 215$ , because  $\Delta Ca^*/\sigma_c$  was smaller than 1 even with a larger  $x$ , information transfer by  $Ca_{res}$  is robust with a larger  $CV_a$ . In contrast, in the cell volume, because  $\Delta Ca^*/\sigma_c$  was larger than 1 even with a small  $x$ , information transfer by  $Ca_{res}$  is not robust, even with a small  $CV_a$ .

Next, we confirmed that, when  $\Delta Ca^*/\sigma_c$  is smaller than 1, the distribution of  $Ca_{res}$  with  $Amp_{PF} = \mu_a$  and the averaged

distribution of  $Ca_{res}$  for  $Amp_{PF} = \mu_a \pm x$  becomes the same. We quantified the similarities between the two distributions of  $Ca_{res}$  by the  $\chi^2$  distance. In the spine volume (Fig. 4 D, red), most of the  $\Delta Ca^*/\sigma_c$  were smaller than 1, and the  $\chi^2$  distance were also small, indicating that  $\Delta Ca^*/\sigma_c$  is smaller than 1 and the two distributions of  $Ca_{res}$  are quite similar in the spine volume. In contrast, in the cell volume (Fig. 4 D, blue), most of the  $\Delta Ca^*/\sigma_c$  were larger than 1 and the  $\chi^2$  distance were almost 1, indicating that  $\Delta Ca^*/\sigma_c$  is larger than 1, and the two distributions of  $Ca_{res}$  are quite different. Therefore, when  $\Delta Ca^*$ , the gap of two distributions of  $Ca_{res}$ , is smaller than  $\sigma_c$ , the SD of the distribution of  $Ca_{res}$ , then the distribution of  $Ca_{res}$  does not change and becomes robust against fluctuation of the PF input.

In summary, in the spine volume,  $\sigma_c$ , the SD of the distribution of  $Ca_{res}$ , is larger than  $\Delta Ca^*$ , the gap of the mode of the distribution of  $Ca_{res}$ , which reflects the fluctuation of  $Amp_{PF}$ , indicating that the range of  $x$  satisfying  $\Delta Ca^* \ll \sigma_c$  is wider. This means that the distribution of  $Ca_{res}$  with fluctuation of amplitude of the PF input conforms to that without fluctuation of amplitude of the PF input. Moreover,  $\Delta Ca^* \ll \sigma_c$  indicates that the distribution of  $Ca_{res}$  caused by extrinsic noise,  $\Delta Ca^*$ , is much smaller than that caused by intrinsic noise,  $\sigma_c$ . Hence, the information transfer by  $Ca_{res}$  becomes robust against the fluctuation of the amplitude of the PF input. In contrast, in the cell volume, the SD of the distribution of  $Ca_{res}$  without fluctuation of the amplitude of the PF input is small, and the averaged distribution of  $Ca_{res}$  with fluctuation of the amplitude of the PF input does not conform to that without fluctuation of the amplitude of the PF input. Moreover,  $\Delta Ca^* > \sigma_c$  indicates that the distribution gap of  $Ca_{res}$  caused by extrinsic noise,  $\Delta Ca^*$ , is larger than that caused by intrinsic noise,  $\sigma_c$ . Hence, the information transfer by  $Ca_{res}$  is not robust against fluctuation of amplitude of the PF input.

### The mechanism of sensitivity

In the detailed stochastic model, the  $Ca^{2+}$  response was more sensitive to lower numbers of PF inputs in the spine volume than the cell volume (23). We tried to examine the sensitivity in the simple stochastic model and defined the “sensitivity” as follows. For each volume, the PF input was given by the Gaussian distribution with the fixed SD, and the average amplitude of the PF input was varied (see Materials and Methods).  $Amp^*$  was defined as an index of sensitivity for each volume, with the average amplitude,  $\mu_s$ , giving the maximum of mutual information. Smaller  $Amp^*$  indicates higher sensitivity to the lower amplitude of the PF input.

In the spine volume, the mutual information exhibited the bell-shaped response, where  $Amp^* = 100$  gives the maximum mutual information (Fig. 5 A, black line and the white triangle; Fig. 5 B; see Fig. S6, A and F). With the increase in volume,  $Amp^*$  shifted to  $\sim 220$  (Fig. 5 A,

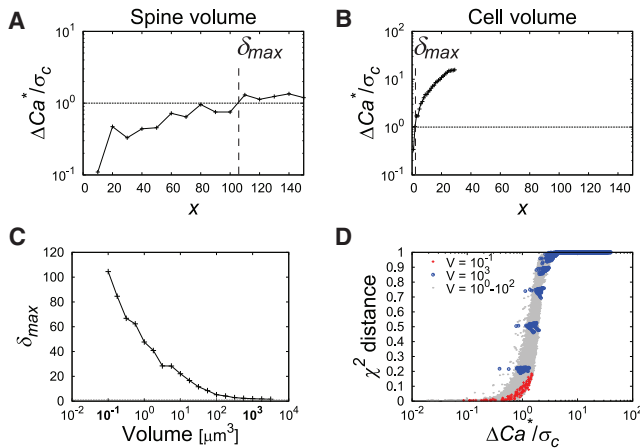

FIGURE 4 The ratio between extrinsic and intrinsic noise,  $\Delta Ca^*/\sigma_c$ , determines the range of robustness. (A and B) the relative amplitude of the PF input,  $x$ , dependency of  $\Delta Ca^*/\sigma_c$  with  $\mu_a = 180$  in the spine volume (A) and in the cell volume (B) are provided. The robustness index  $\delta_{max}$  is defined as  $x$  giving  $\Delta Ca^*/\sigma_c = 1$ . (C) The volume-dependency of  $\delta_{max}$  for  $\mu_a = 180$  is provided. (D) The relationship between  $\Delta Ca^*/\sigma_c$  and the  $\chi^2$  distance between the averaged distribution of the distributions of  $Ca_{res}$  with  $Amp_{PF} = \mu_a \pm x$  and the distribution of  $Ca_{res}$  with  $Amp_{PF} = \mu_a$  are provided. The red points, blue points, and gray dots indicate the value obtained in the spine volume, the cell volume, and the intermediate volumes, respectively. To see this figure in color, go online.

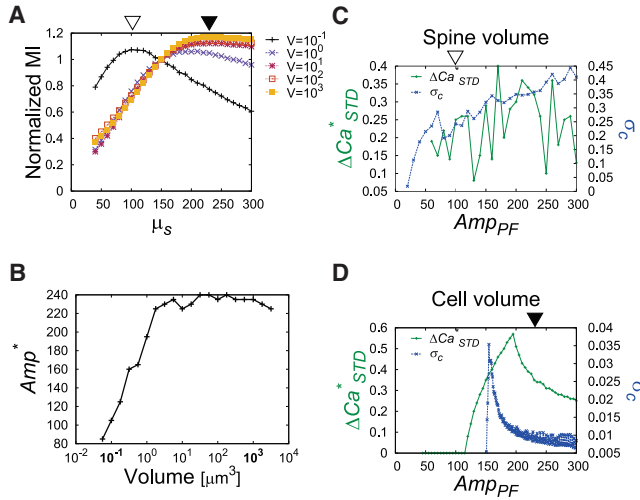

FIGURE 5 The mechanism of sensitivity. (A)  $\mu_s$ , the average of the input distribution of  $Amp_{PF}$ , dependency of the mutual information is provided. The mutual information is normalized by the value of that with  $\mu_s = 150$ . The brighter color indicates the larger volume. The white and black triangles denote  $Amp^*$ , the amplitude of the PF input realizing the maximum of the mutual information, in the spine volume and in the cell volume, respectively.  $Amp^* = 100$  in the spine volume and  $Amp^* = 235$  in the cell volume. The input distribution of  $Amp_{PF}$  is utilized as the Gaussian distribution with  $STD = 40$ , SD. (B) The volume-dependency of the amplitude of the PF input realizing the maximum of the mutual information,  $Amp^*$  is provided. (C and D) The  $Amp_{PF}$  dependencies of  $\Delta Ca^*_{STD}$ , the dynamic range of the distribution of  $Ca_{res}$  for  $Ca_{res} > \theta$  (green), and  $\sigma_c$ , the SD of the distribution of  $Ca_{res}$  (blue).  $STD = 40$  was used. The white and black triangles denote  $Amp^*$  in the spine volume and in the cell volume, respectively. To see this figure in color, go online.

orange line and black triangle; Fig. 5 B; see Fig. S6, E and J). This result indicates that the spine volume shows higher sensitivity to the lower amplitude of the PF input than the larger volume including the cell volume.

We considered the mechanism that the spine shows higher sensitivity to the lower amplitude of the PF input. When the SD of the PF input distribution is the same, the mutual information depends on  $\Delta Ca^*_{STD}$ , the dynamic range of the output, and  $\sigma_c$ , the SD of the output (Fig. S7). For example, when the dynamic range of the output is the same, the smaller SD of the output gives more mutual information. When the SD of the output is the same, the broader dynamic range gives more mutual information. For simplicity, the window width of the input distribution of  $Amp_{PF}$  was set as the finite range defined as the average  $\pm$  SD of the input distribution of  $Amp_{PF}$ , i.e.,  $\mu_s \pm STD$ , and the dynamic range was denoted as the gap of mode of the distribution of  $Ca_{res}$  between the upper bound ( $Amp_{PF} = \mu_s + STD$ ) and lower bound ( $Amp_{PF} = \mu_s - STD$ ) of the input distribution of  $Amp_{PF}$ , i.e.,  $\Delta Ca^*_{STD} = Ca^*(\mu_s + STD) - Ca^*(\mu_s - STD)$ .

First, we considered  $\Delta Ca^*_{STD}$ , the dynamic range of the output. We defined  $\psi(V)$  for each volume of  $Amp_{PF}$  as the smallest amplitude of the PF input where the  $Ca_{res}$  of some trials exceed  $\theta$  (see Fig. S8 A). In the spine volume,  $Ca^*$  linearly increased along  $Amp_{PF}$  for  $Amp_{PF} > \psi(V)$

(Figs. S5 C and S8 A); hence,  $\Delta Ca^*_{STD}$  was largely variable and independent of  $Amp_{PF}$  (Fig. 5 C; see Fig. S8, B and E–H). In contrast, in the cell volume,  $\Delta Ca^*_{STD}$  was bell-shaped curve with the maximum at  $Amp_{PF} = 200$  (Fig. 5 D; see Fig. S8, C and U–X).

Next, we considered  $\sigma_c$ , the SD of  $Ca_{res}$  for  $Ca_{res} > \theta$ . In the spine volume,  $\sigma_c$  gradually increased with the increase in  $Amp_{PF}$  for  $Amp_{PF} > \psi(10^{-1}) \approx 50$  (Fig. 5 C, blue line). In contrast, in the cell volume,  $\sigma_c$  became largest at  $Amp_{PF} = \sim 150$  and gradually decreased with the increase in  $Amp_{PF}$  (Fig. 5 D, blue line).

In the spine volume,  $\Delta Ca^*_{STD}$  was almost constant for  $Amp_{PF} > 60$  and  $\sigma_c$  increased along  $Amp_{PF}$ ; therefore, the mutual information became maximum at approximately  $Amp_{PF} = 60$  (see Fig. S8, E–H, black dashed line; also see Fig. S6, A and F). In contrast, in the cell volume, the mutual information became maximum at  $Amp_{PF} = 235$ , which is greater than  $Amp_{PF} = 200$ , giving the maximum of  $\Delta Ca^*_{STD}$  (Fig. 5, A and D; see Fig. S8, U–X, black dashed line; also see Fig. S6, E and J). This is because, that despite the higher  $\Delta Ca^*_{STD}$ , the  $\sigma_c$  was larger and the loss of information became large. Decreasing  $\sigma_c$  resulted in increase of mutual information.

Thus, the mutual information becomes maximum at  $Amp_{PF} = 60$  in the spine volume and at  $Amp_{PF} = 250$  in the cell volume, indicating the higher sensitivity to lower amplitude of the PF input in the spine volume.

## The mechanism of efficiency

We defined the efficiency as the mutual information per PF input. The average of the PF input was given by  $\mu_s \times V$ , whose dimension is equal to number of molecules. Efficiency means how much information can be transferred by a unitary PF input. Higher mutual information per PF input indicates higher efficiency. The mutual information monotonically increased with the increase in volume, and the rate of the increase of the mutual information decreased with the increase in volume (Fig. 6 A, black); therefore, the mutual information per PF input monotonically decreased (Fig. 6 B, black line), indicating that the mutual information per PF input, i.e., the efficiency, was larger in the spine volume and decreased as the volume increased to the cell volume (Fig. 6 B, black line).

Next, we examined the mechanism of the volume-dependency of the mutual information. The slope of the mutual information decreased with the increase in volume and became close to a logarithmic increase in the larger volume (Fig. 6 A, black). Then, we assumed that the volume-dependent increase of the mutual information is approximated with constants,  $a$ ,  $b$ , and  $c$  (see Materials and Methods), as given by the following:

$$I(Ca_{res}; \Delta t) \approx a \log_2(b + c \times V). \quad (27)$$

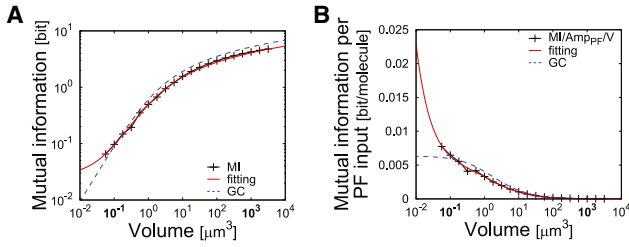

**FIGURE 6** The mechanism of efficiency. (A) The volume-dependency of the mutual information between  $Amp_{PF}$  and  $Ca_{res}$  is provided. (B) The volume-dependency of the mutual information per PF input, i.e., the efficiency is shown. The total mutual information is shown in black; the fitted curve of the total mutual information with the  $a \log_2(b + c \times V)$  with  $a = 0.3924651$ ,  $b = 1.049141$ , and  $c = 1.330285$ , is shown in red; the channel capacity of the Gaussian channel,  $1/2 \log_2(1 + cV)$  with  $c = 0.5128671$ , is shown in blue (see [Materials and Methods](#)). We assume the input distribution of  $Amp_{PF}$  as the Gaussian distribution with  $\mu_s = 150$ , the average of the amplitude of the distribution of the PF input, and  $STD = 40$  as the SD of the distribution of the PF input. To see this figure in color, go online.

This function fits well with the volume-dependent mutual information (Fig. 6 A, red line) and the mutual information per PF input (Fig. 6 B, red line), indicating that this function captures the features of the volume-dependency of the mutual information in the spine volume and the larger volume.

We also considered the Gaussian channel, which is a simple linear transmission system. For input  $X$ , when the system noise  $Z$  obeys the Gaussian distribution, the output  $Y = X + Z$  also obeys the Gaussian distribution. In this case, under the constraint  $E[X^2] < F$ , the mutual information (channel capacity) between the input,  $X$ , and the output,  $Y$ , is simply described as follows:

$$I(Y; X) = \frac{1}{2} \log_2 \left( 1 + \frac{F}{\sigma_Z^2} \right) \quad (28)$$

where  $F$  denotes the power constraint of input and  $\sigma_Z$  denotes the SD of the noise intensity. Here,  $F$  is regarded as a constant value because the input distribution for calculating  $I(Ca_{res}; \Delta t)$  in Eq. 28 (Fig. 6, blue line) is assumed to be unchanged. It has been shown that the SD of reactions is proportional to the power of the number of molecules, i.e., volume, so that the fluctuation of the number of molecules can be approximated as  $\sigma_Z^2 \propto V$  (29). Then, the fluctuation of concentration of the molecules can be approximated by  $\sigma_Z^2 = (\sigma'_Z/V)^2 \propto V^{-1}$ . Therefore, the mutual information for the Gaussian channel is given by the following:

$$I(Ca_{res}; \Delta t) \approx \frac{1}{2} \log_2(1 + c \times V) \quad (29)$$

(Fig. 6, A and B, blue lines). Equations 27 and 29 indicate the same volume-dependency of the mutual information. However, in the smaller volume including the spine volume, the mutual information per PF input of the  $Ca^{2+}$  response

was larger than that of the Gaussian channel (Fig. 6 B). This difference in the volume-dependency is likely to be caused by the different values of the parameters, which were  $a = 0.3924651$  and  $b = 1.049141$  in the fitted function, whereas  $1/2$  and  $1$  in the Gaussian channel, respectively. There were other differences in both systems; the noise of the system in this study is not exactly a Gaussian noise, and the input-output relation is nonlinear. Despite such differences, both systems exhibited similar volume-dependency of the mutual information, suggesting that the more efficient information transfer in the smaller volume is a universal property in the general information transduction systems.

## DISCUSSION

In this study, we constructed the simple stochastic model of the  $Ca^{2+}$  increase in the spine of PF-cerebellar Purkinje cell synapse. The simple stochastic model reproduces consistent properties of information transfer with the detailed stochastic model, indicating that these properties are not lost by the simplification of the model. We clarified the mechanisms of robustness, sensitivity, and efficiency, and we showed that these properties become prominent in the spine volume (Fig. 7). The robustness appears in condition where the SD of the distribution of the  $Ca^{2+}$  response, intrinsic noise, is larger than the fluctuation of the distribution of the  $Ca^{2+}$  response caused by the PF input fluctuation, extrinsic noise.

Higher sensitivity to a lower amplitude of the PF input requires the wider dynamic range of the  $Ca^{2+}$  response and the smaller SD of the distribution of the  $Ca^{2+}$  response in the range of the lower amplitude of the PF input. In the spine volume, because of the stochasticity in reactions, even the weak PF input can induce a large  $Ca^{2+}$  increase, resulting in a wider dynamic range of the  $Ca^{2+}$  response for the lower amplitude of the PF input in the spine volume than in the cell volume. Moreover, the SD of the distribution of the  $Ca^{2+}$  response in the range of the lower amplitude of the PF input was small. In the larger volume than the spine volume, the sensitivity abruptly decreased because stronger PF input was required for compensating the large SD of the distribution of the  $Ca^{2+}$  response.

The highest efficiency in the spine volume is derived from the nature of the volume-dependency of mutual information; the rate of increase of the mutual information monotonically decreased with the increase in volume. Then, the mutual information per PF input, efficiency, becomes larger in the smaller volume. This result indicates that the spine utilizes the limit of the smallness to acquire the highest efficiency.

Robustness appears when intrinsic noise is larger than extrinsic noise. Sensitivity appears because of the stochasticity in the  $Ca^{2+}$  increase. Efficiency appears because of the nature of the volume-dependency of information transfer. These characteristics and the underlying mechanisms emerge from the effect of the small volume of the spine,

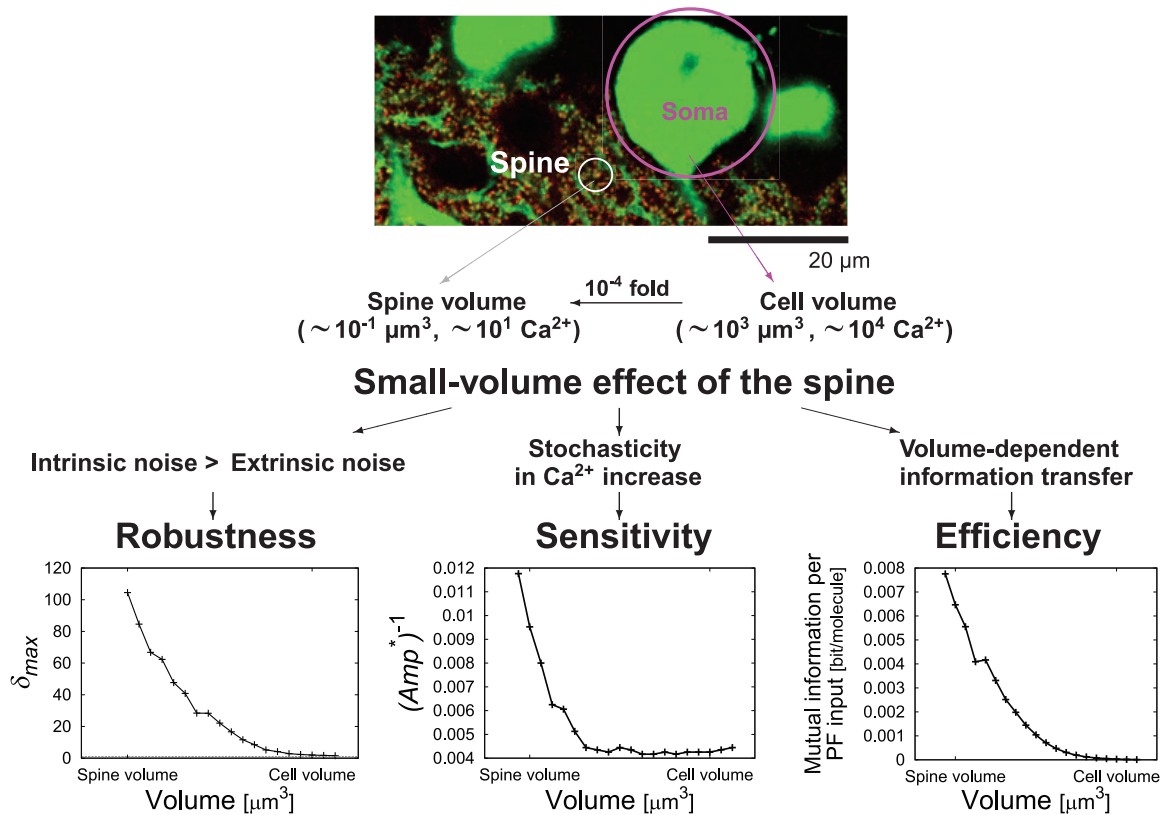

FIGURE 7 Summarizing figure. The small-volume effect enables the spine to have robust, sensitive, and efficient information transfer. Robustness appears when intrinsic noise is larger than extrinsic noise. Sensitivity appears because of the stochasticity in  $\text{Ca}^{2+}$  increase. Note that, as index for the sensitivity in this figure, the inverse of  $\text{Amp}^*$  (Fig. 5 B) is used. Efficiency appears because of the nature of the volume-dependency of information transfer. To see this figure in color, go online.

which we denote “the small-volume effect.” The small-volume effect enables the spine to have robust, sensitive, and efficient information transfer. The small-volume effect may be seen not only in spines but also in other small intracellular organelles; it comprises the general strategy for biological information transfer. The small-volume effect is one of the reasons why the spine has to be so small. The small-volume effect is also equivalent to the effect of small numbers of molecules, with the small-number effect suggesting that the robustness, sensitivity, and efficiency can also be seen under the conditions where numbers of molecules are limited even in a larger volume. Naturally, the reasons why the spine is so small are not only the above-mentioned small-volume effect, but also to obtain the extremely small diffusion space, to increase the surface area in limited volume, to compartmentalize the biochemical reaction field, etc. However, regarding the informatic advantage, the smallness of the spine provides the robust, sensitive, and efficient information transfer.

In addition, the information transfer in the spine volume is much less than 1 bit, indicating that the information transfer in a spine is insufficient to reliably determine even a binary decision. Despite the low reliability of a single spine, summation of the  $\text{Ca}^{2+}$  response in many spines may

overcome the amplitude of the  $\text{Ca}^{2+}$  in a cell in terms of the reliability of information transfer. Thus, the smallness and numerosity of spines may be a unique strategy to realize robust, sensitive, and efficient information transfer in neurons. Furthermore, the information transfer by numerous spines can be reliable to realize the motor control and cerebellar learning through the long-term depression (LTD) (13,14).

It has been known that in most excitatory synapses, the  $\text{Ca}^{2+}$  increase in the spine, evoked by glutamate released from the presynaptic fiber, is mainly mediated by N-methyl-D-aspartate receptors (NMDAR), another glutamate-gated ion channel that, in contrast to the receptors of the PF-Purkinje cell synapse, such as AMPA and metabotropic glutamate receptors (mGluR1), are endowed with a high  $\text{Ca}^{2+}$  permeability (30,31). In the future, we will analyze whether the  $\text{Ca}^{2+}$  increase mediated by NMDAR in the spine also shows robustness, sensitivity, and efficiency and study whether such properties are receptor-type-specific or are conserved among different varieties of spine regardless of the type of the receptors.

In general, most of artificial devices for information transfer have physical limitations in design. For example, in design of electrical devices, the limitations of space and

power consumption critically determine the upper bound of performance. The strategy for the information transfer in the spine looks to be opposite to those in these devices, however, and the small-volume effect may provide the new design principle of devices for information transfer.

## SUPPORTING MATERIAL

Supporting Materials and Methods, eight figures, and two tables are available at [http://www.biophysj.org/biophysj/supplemental/S0006-3495\(17\)30037-1](http://www.biophysj.org/biophysj/supplemental/S0006-3495(17)30037-1).

## AUTHOR CONTRIBUTIONS

M.F. and S.K. conceived the project. M.F. constructed the model and performed the stochastic simulation. M.F., K.O., Y.K., M.H., and S.K. analyzed the data. M.F. and K.O. contributed theoretical analysis. M.F. and S.K. wrote the manuscript.

## ACKNOWLEDGMENTS

We are grateful to Dr. Hidetoshi Urakubo, Dr. Takuya Koumura, Dr. Shin-suke Uda, Dr. Yuichi Sakumura and our laboratory members for their critical reading of this manuscript, and Dr. Tamiki Komatsuzaki for fruitful discussion.

This work was supported by The Creation of Fundamental Technologies for Understanding and Control of Biosystem Dynamics, CREST, from the Japan Science and Technology (JST). M.F. was funded by the Japan Society for the Promotion of Science (JSPS) (JSPS Grants-in-Aid for Scientific Research (KAKENHI) grant No. 6K12508).

## REFERENCES

- Napper, R. M., and R. J. Harvey. 1988. Number of parallel fiber synapses on an individual Purkinje cell in the cerebellum of the rat. *J. Comp. Neurol.* 274:168–177.
- Stuart, G., N. Spruston, and M. Häusser. 2007. *Dendrites*. Oxford University Press, Oxford, UK.
- Lee, K. J., H. Kim, and I. J. Rhyu. 2005. The roles of dendritic spine shapes in Purkinje cells. *Cerebellum*. 4:97–104.
- Harris, K. M., and J. K. Stevens. 1988. Dendritic spines of rat cerebellar Purkinje cells: serial electron microscopy with reference to their biophysical characteristics. *J. Neurosci.* 8:4455–4469.
- Rapp, M., I. Segev, and Y. Yarom. 1994. Physiology, morphology and detailed passive models of guinea-pig cerebellar Purkinje cells. *J. Physiol.* 474:101–118.
- Takács, J., and J. Hámos. 1994. Developmental dynamics of Purkinje cells and dendritic spines in rat cerebellar cortex. *J. Neurosci. Res.* 38:515–530.
- Antunes, G., and E. De Schutter. 2012. A stochastic signaling network mediates the probabilistic induction of cerebellar long-term depression. *J. Neurosci.* 32:9288–9300.
- Anwar, H., I. Hepburn, ..., E. De Schutter. 2013. Stochastic calcium mechanisms cause dendritic calcium spike variability. *J. Neurosci.* 33:15848–15867.
- Barbour, B. 1993. Synaptic currents evoked in Purkinje cells by stimulating individual granule cells. *Neuron*. 11:759–769.
- Okubo, Y., H. Sekiya, ..., M. Iino. 2010. Imaging extrasynaptic glutamate dynamics in the brain. *Proc. Natl. Acad. Sci. USA*. 107:6526–6531.
- Isope, P., and B. Barbour. 2002. Properties of unitary granule cell → Purkinje cell synapses in adult rat cerebellar slices. *J. Neurosci.* 22:9668–9678.
- Ito, M. 1970. Neurophysiological aspects of the cerebellar motor control system. *Int. J. Neurol.* 7:162–176.
- Kawato, M. 1999. Internal models for motor control and trajectory planning. *Curr. Opin. Neurobiol.* 9:718–727.
- Kawato, M., S. Kuroda, and N. Schweighofer. 2011. Cerebellar supervised learning revisited: biophysical modeling and degrees-of-freedom control. *Curr. Opin. Neurobiol.* 21:791–800.
- Miyakawa, H., V. Lev-Ram, ..., W. N. Ross. 1992. Calcium transients evoked by climbing fiber and parallel fiber synaptic inputs in guinea pig cerebellar Purkinje neurons. *J. Neurophysiol.* 68:1178–1189.
- Wang, S. S., W. Denk, and M. Häusser. 2000. Coincidence detection in single dendritic spines mediated by calcium release. *Nat. Neurosci.* 3:1266–1273.
- Ito, M. 2002. The molecular organization of cerebellar long-term depression. *Nat. Rev. Neurosci.* 3:896–902.
- Mauk, M. D., K. S. Garcia, ..., P. M. Steele. 1998. Does cerebellar LTD mediate motor learning? Toward a resolution without a smoking gun. *Neuron*. 20:359–362.
- Steinmetz, J. E. 1990. Classical nictitating membrane conditioning in rabbits with varying interstimulus intervals and direct activation of cerebellar mossy fibers as the CS. *Behav. Brain Res.* 38:97–108.
- Doi, T., S. Kuroda, ..., M. Kawato. 2005. Inositol 1,4,5-trisphosphate-dependent Ca<sup>2+</sup> threshold dynamics detect spike timing in cerebellar Purkinje cells. *J. Neurosci.* 25:950–961.
- Honda, M., H. Urakubo, ..., S. Kuroda. 2013. A common framework of signal processing in the induction of cerebellar LTD and cortical STDP. *Neural Netw.* 43:114–124.
- Honda, M., H. Urakubo, ..., S. Kuroda. 2011. Analysis of development of direction selectivity in retinotectum by a neural circuit model with spike timing-dependent plasticity. *J. Neurosci.* 31:1516–1527.
- Koumura, T., H. Urakubo, ..., S. Kuroda. 2014. Stochasticity in Ca<sup>2+</sup> increase in spines enables robust and sensitive information coding. *PLoS One*. 9:e99040.
- Cao, Y., D. T. Gillespie, and L. R. Petzold. 2006. Efficient step size selection for the tau-leaping simulation method. *J. Chem. Phys.* 124:044109.
- Gillespie, D. T., A. Hellander, and L. R. Petzold. 2013. Perspective: stochastic algorithms for chemical kinetics. *J. Chem. Phys.* 138:170901.
- Cheong, R., A. Rhee, ..., A. Levchenko. 2011. Information transduction capacity of noisy biochemical signaling networks. *Science*. 334:354–358.
- Shannon, C. E. 1948. A mathematical theory of communication. *Bell Syst. Tech. J.* 27:379–423.
- Rancz, E. A., and M. Häusser. 2006. Dendritic calcium spikes are tunable triggers of cannabinoid release and short-term synaptic plasticity in cerebellar Purkinje neurons. *J. Neurosci.* 26:5428–5437.
- Wang, J., and P. Wolynes. 1995. Intermittency of single molecule reaction dynamics in fluctuating environments. *Phys. Rev. Lett.* 74:4317–4320.
- Li, F., and J. Z. Tsien. 2009. Memory and the NMDA receptors. *N. Engl. J. Med.* 361:302–303.
- Furukawa, H., S. K. Singh, ..., E. Gouaux. 2005. Subunit arrangement and function in NMDA receptors. *Nature*. 438:185–192.

**Biophysical Journal, Volume 112**

**Supplemental Information**

**Small-Volume Effect Enables Robust, Sensitive, and Efficient Information Transfer in the Spine**

**Masashi Fujii, Kaoru Ohashi, Yasuaki Karasawa, Minori Hikichi, and Shinya Kuroda**

# **Supplement to “Small-volume effect enables robust, sensitive and efficient information transfer in the spine”**

Masashi Fujii,<sup>1,2</sup> Kaoru Ohashi,<sup>1</sup> Yasuaki Karasawa,<sup>3</sup> Minori Hikichi,<sup>1</sup> and Shinya Kuroda<sup>1,2,4,\*</sup>

<sup>1</sup>Molecular Genetics Research Laboratory, Graduate School of Sciences, University of Tokyo, Bunkyo-ku, Tokyo, Japan

<sup>2</sup>Department of Biological Sciences, Graduate School of Sciences, University of Tokyo, Bunkyo-ku, Tokyo, Japan

<sup>3</sup>Department of Neurosurgery, Graduate School of Medicine, University of Tokyo, Bunkyo-ku, Tokyo, Japan

<sup>4</sup>CREST, Japan Science and Technology Agency, Bunkyo-ku, Tokyo, Japan

\*Corresponding author

E-mail: skuroda@bs.s.u-tokyo.ac.jp (SK)



## Supporting Material Figures

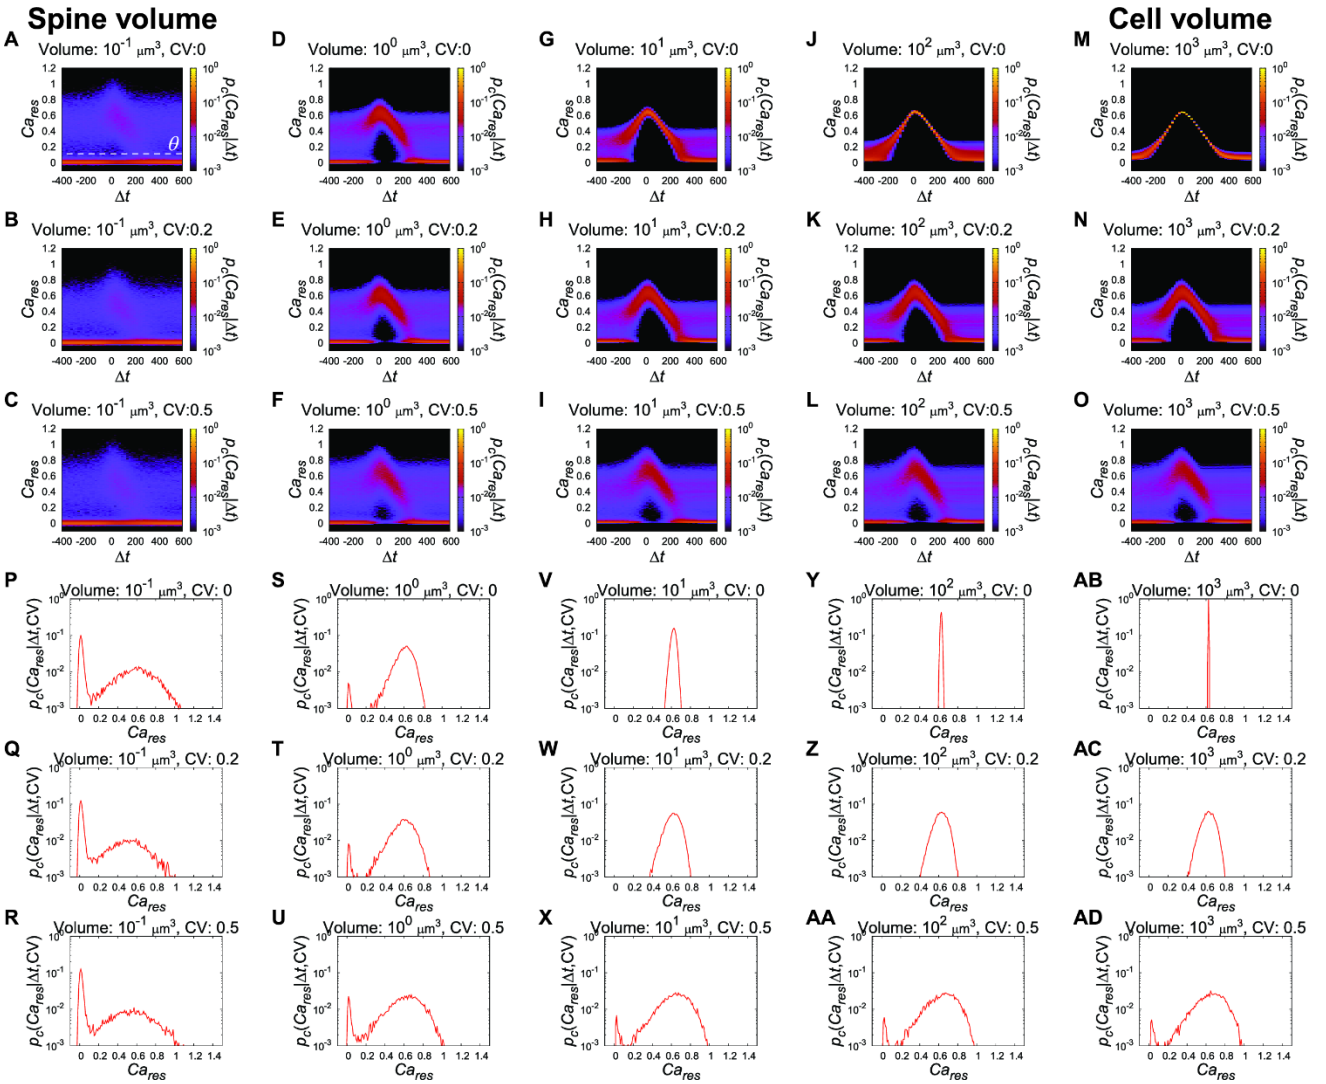

**Figure S1. The  $\Delta t$ -dependency of the distribution of  $Ca_{res}$ .** (A–O) The volume and CV of the amplitude of PF input are indicated. In the spine volume, the distribution of  $Ca_{res}$  is divided into two distributions by the threshold  $\theta = 0.157$  defined as the local minimum of the marginal distribution of  $Ca_{res}$  for  $\Delta t$  s.t.  $p_c(Ca_{res}) = \int_{\Delta t} p_{in}(\tau) p_c(Ca_{res}|\tau) d\tau$ . (P–AD) The cross-sections of (A–O) with  $\Delta t = 0$ . This distribution of  $Ca_{res}$  in the spine volume remained the same regardless of the  $CV_a$  value, whereas, that in the cell volume largely varied.

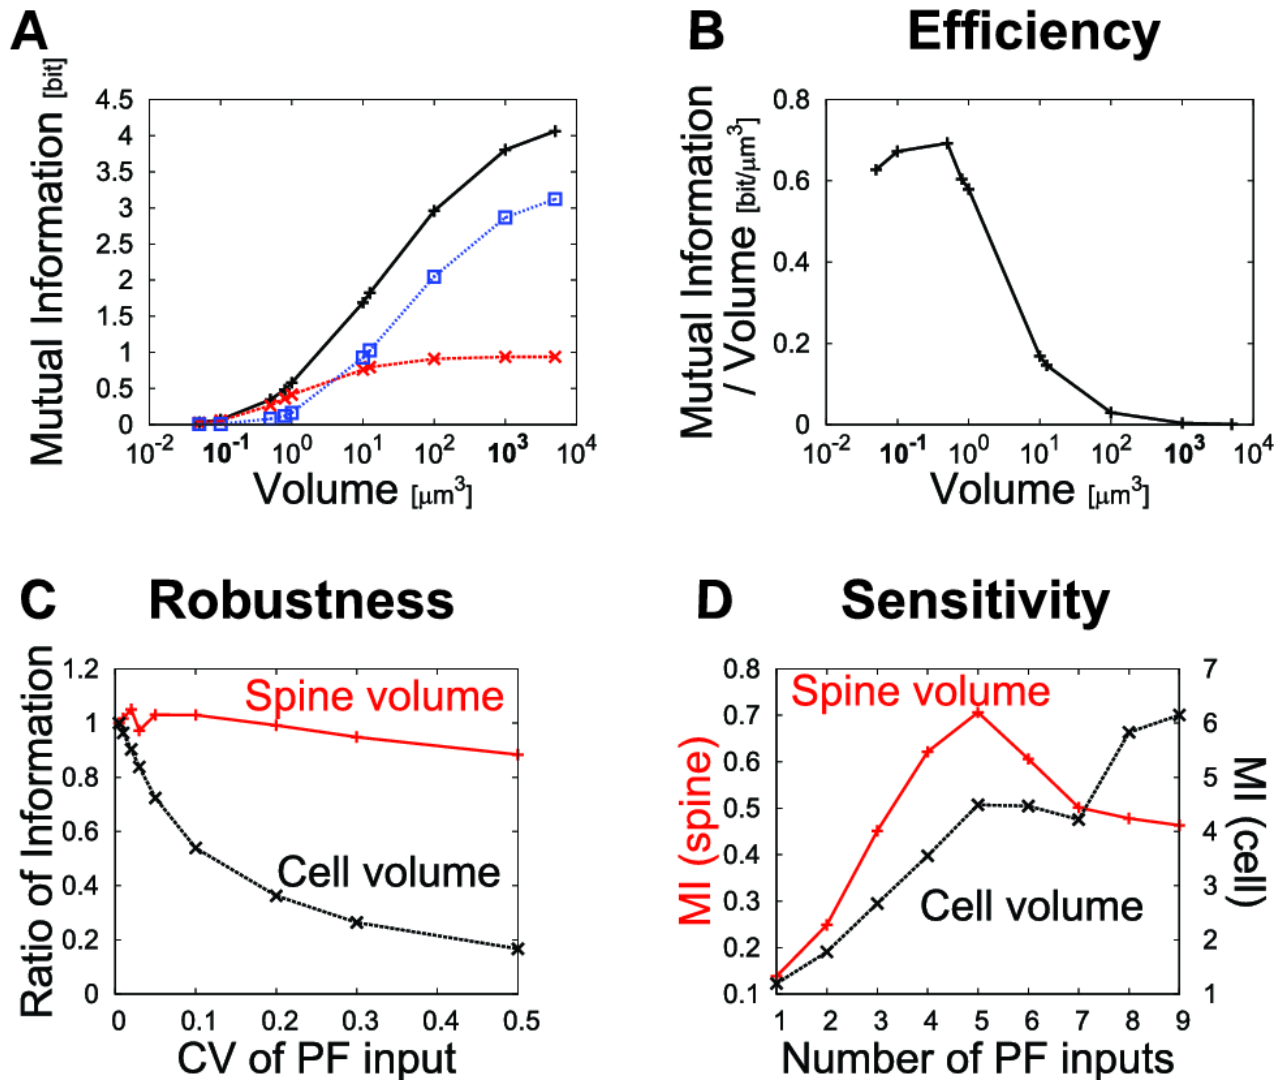

**Figure S2. The efficient, robust and sensitive features of  $\text{Ca}^{2+}$  increase using the detailed stochastic model (23).** (A) The volume dependency of the mutual information between  $\Delta t$ , the PF- and CF-timing, and  $\text{Ca}_{res}$ ,  $\text{Ca}^{2+}$  response. Total mutual information is indicated in *black*; that of the probability component is indicated in *red*; that of the amplitude component is indicated in *blue*. (B) The volume dependency of the mutual information per volume. (C) The CV of the amplitude of PF input dependency of the mutual information. (D) The number of PF inputs dependency of the mutual information. In the detailed stochastic model, the spine volume is  $10^{-1} \mu\text{m}^3$  and the cell volume is  $5 \times 10^3 \mu\text{m}^3$  (23)

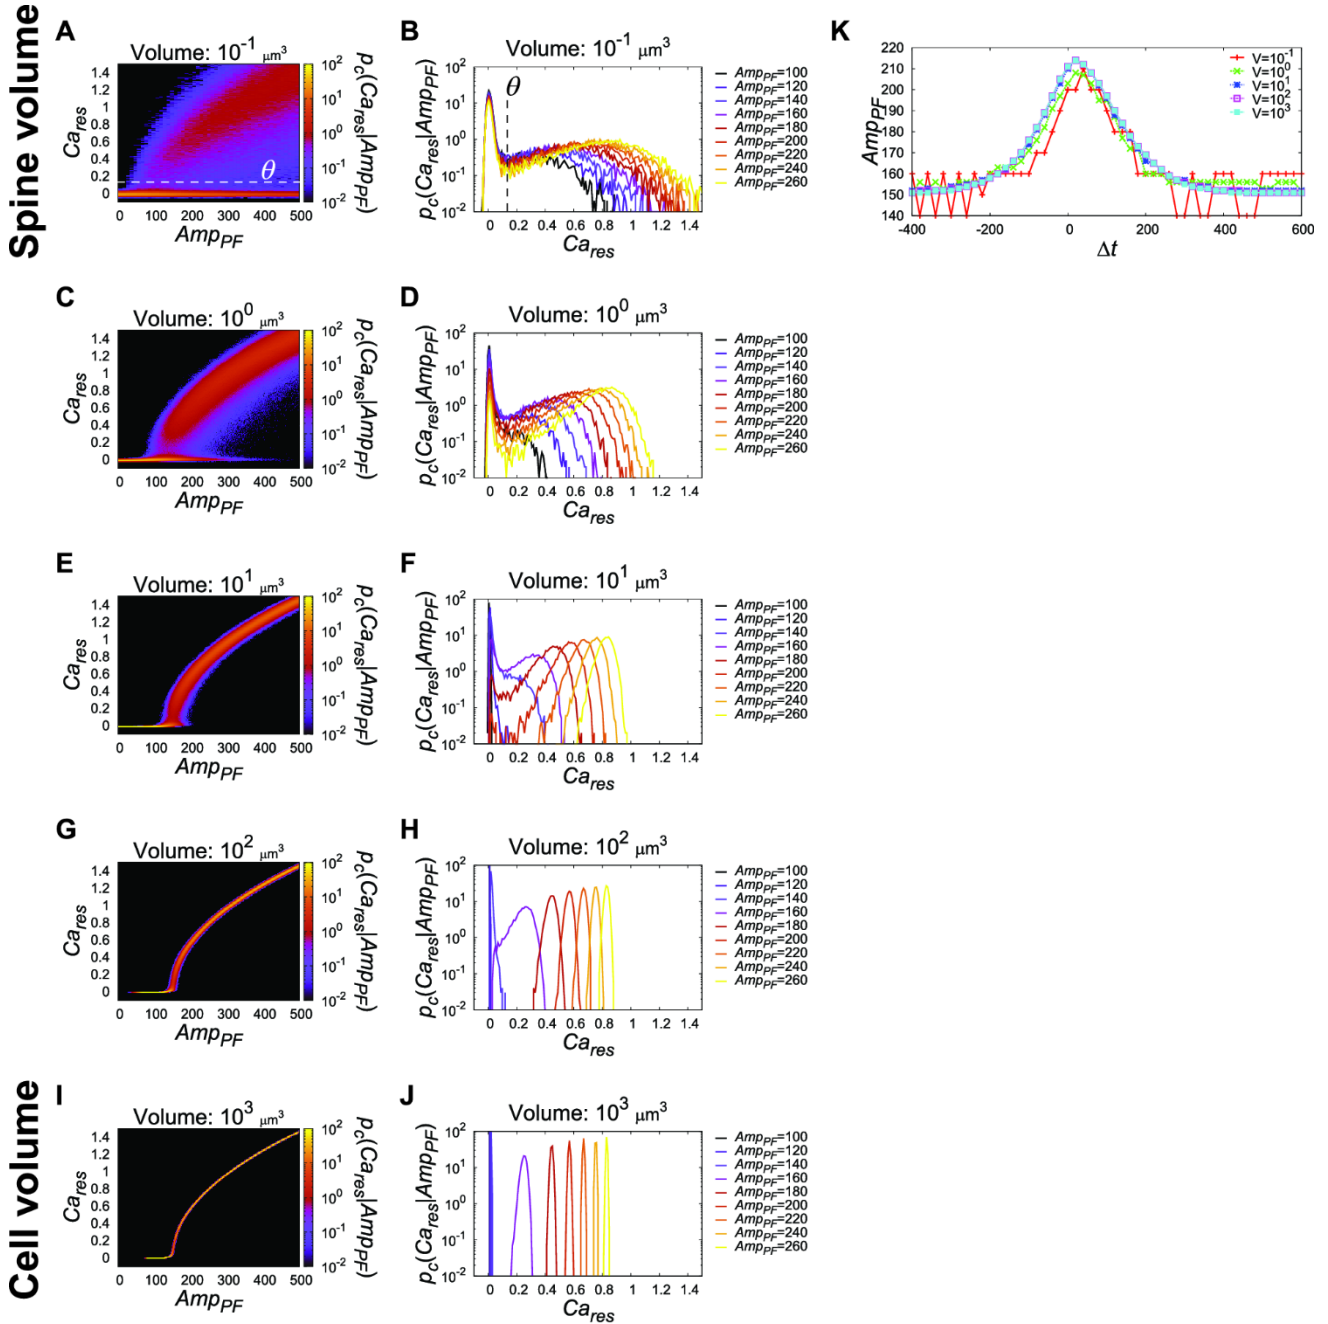

**Figure S3. The  $Amp_{PF}$ -dependency of the distribution of  $Ca_{res}$  in the indicated volumes. (A, C, E, G, I) Distribution of  $Ca_{res}$ . (B, D, F, H, J) The cross-section of distribution of  $Ca_{res}$  at the indicated  $Amp_{PF}$ .  $\theta(=0.157)$  indicates the threshold dividing the distribution into the ranges with large  $Ca_{res}$  and with small  $Ca_{res}$  (see Fig. S1). (K) The  $Amp_{PF}$  providing  $p_c(Ca_{res}|Amp_{PF})$ , the distribution of  $Ca_{res}$  with PF input alone, closest to  $p_c(Ca_{res}|\Delta t)$ , the distribution of  $Ca_{res}$  with PF and CF inputs with various  $\Delta t$ .**

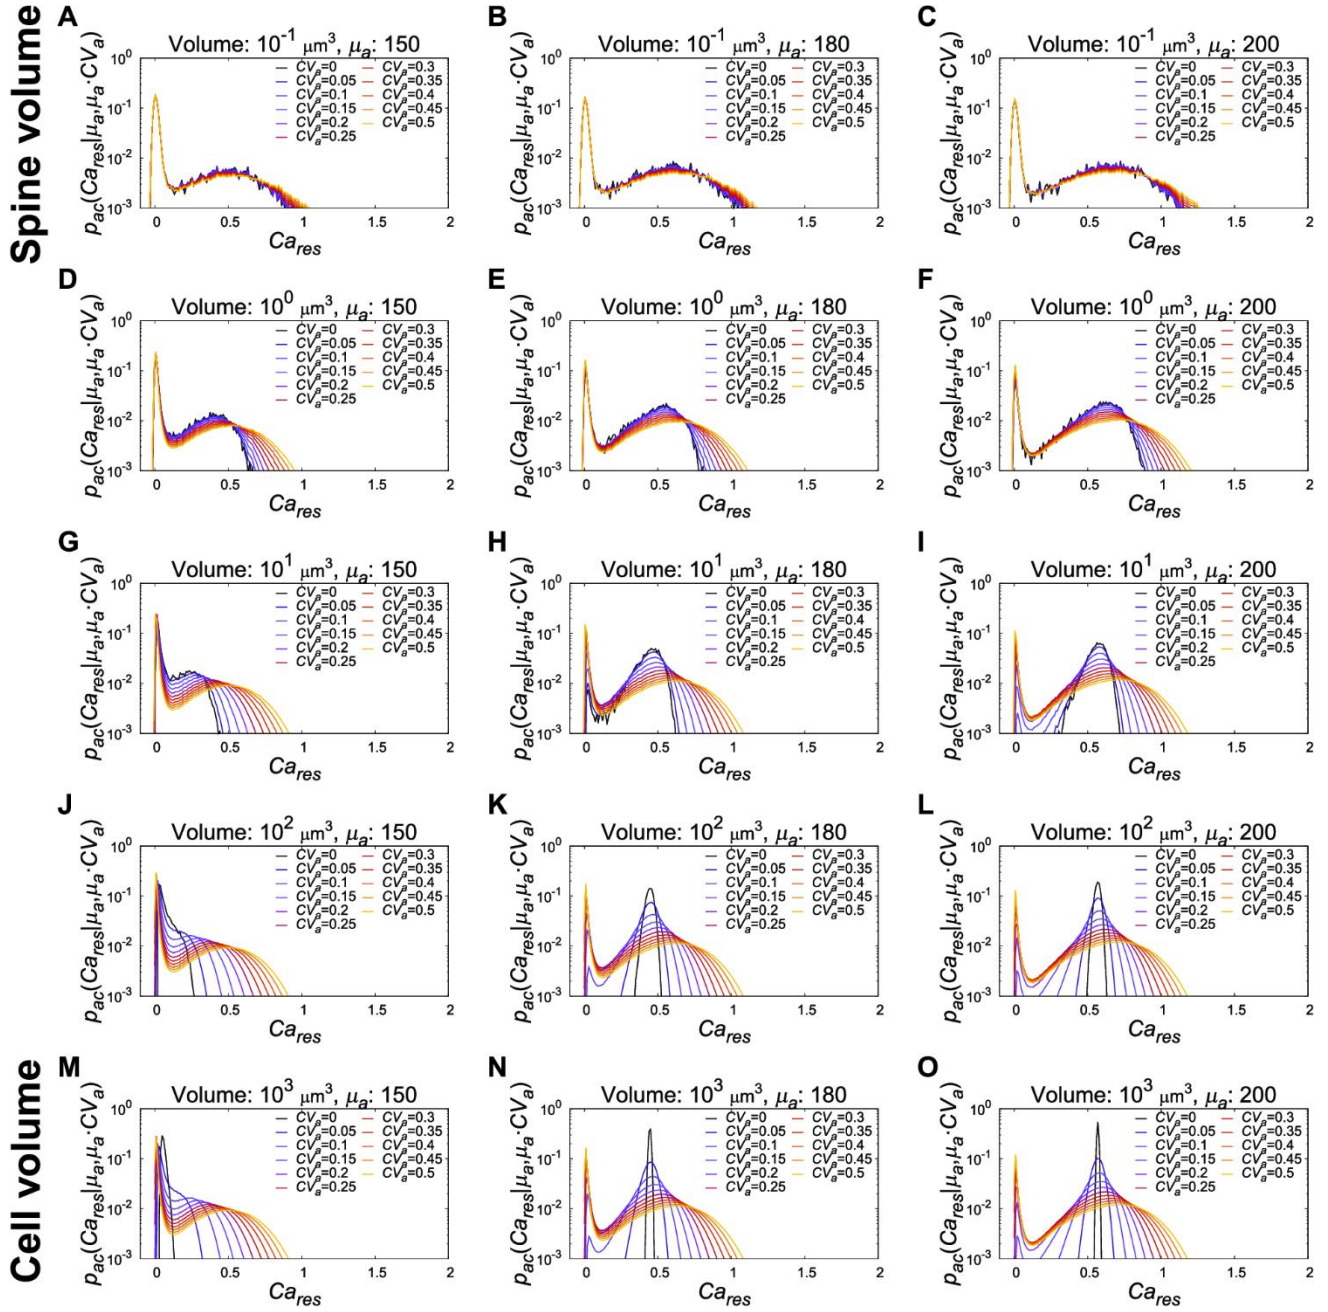

**Figure S4. Distributions of  $Ca_{res}$  against  $CV_a$  with the indicated volumes and  $\mu_a$ , the average of  $Amp_{PF}$ .**

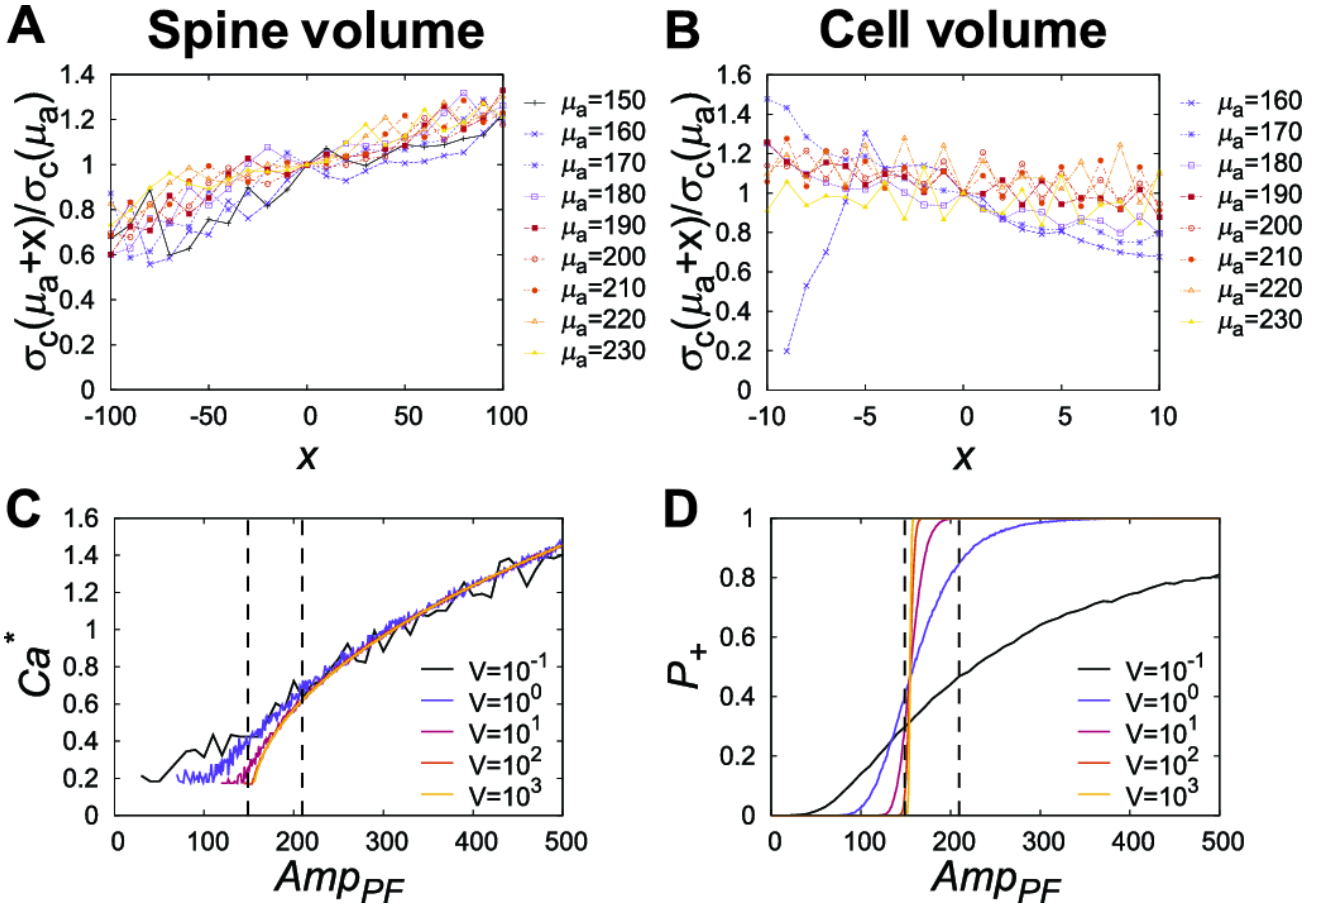

**Figure S5. The  $Amp_{PF}$  dependency of  $\sigma_c$ ,  $Ca^*$  and  $P_+$ .** (A, B)  $\sigma_c(\mu_a + x)$  can be regarded as  $\sigma_c(\mu_a)$  up to the upper bound of the range of  $x$  satisfying the Eq. 21 in the main text. (A) Spine volume. (B) Cell volume.  $\sigma_c(\mu_a + x)/\sigma_c(\mu_a)$  were almost within the range of 0.8 to 1.2, assuming that  $\sigma_c(\mu_a + x)$  is approximated by  $\sigma_c(\mu_a)$ . The upper bound of the range of  $x$  satisfying Eq. 21 in the main text in the spine and cell volumes are determined by  $\delta_{max}$  (see Fig. 4A, B). (C) The  $Amp_{PF}$ -dependency of  $Ca^*$ , the mode of the distribution of  $Ca_{res}$  for  $Ca_{res} > \theta$ . (D) The  $Amp_{PF}$ -dependency of  $P_+$ , the probability of  $Ca_{res} > \theta$ .

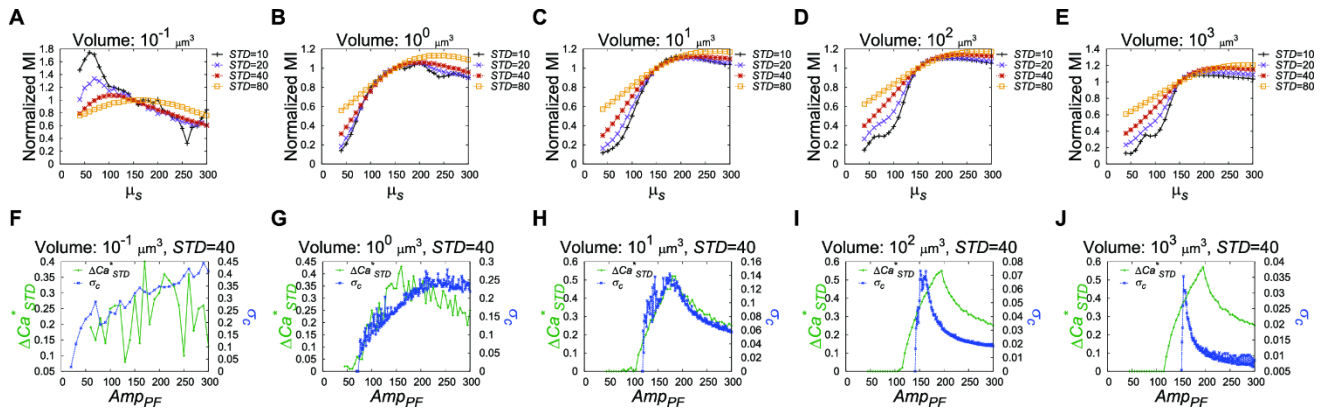

**Figure S6. Mechanism of the sensitivity.** (A–E)  $\mu_s$ , the average of the input distribution of  $Amp_{PF}$ , dependency of the mutual information normalized by the value of that with  $Amp_{PF} = 150$ . (F–J) The  $Amp_{PF}$  dependencies of  $\Delta Ca^*_{STD}$ , the dynamic range of the distribution of  $Ca_{res}$ , (green) and  $\sigma_c$ , the standard deviation of  $Ca_{res}$ , (blue) for  $Ca_{res} > \theta$ . The volume is indicated.

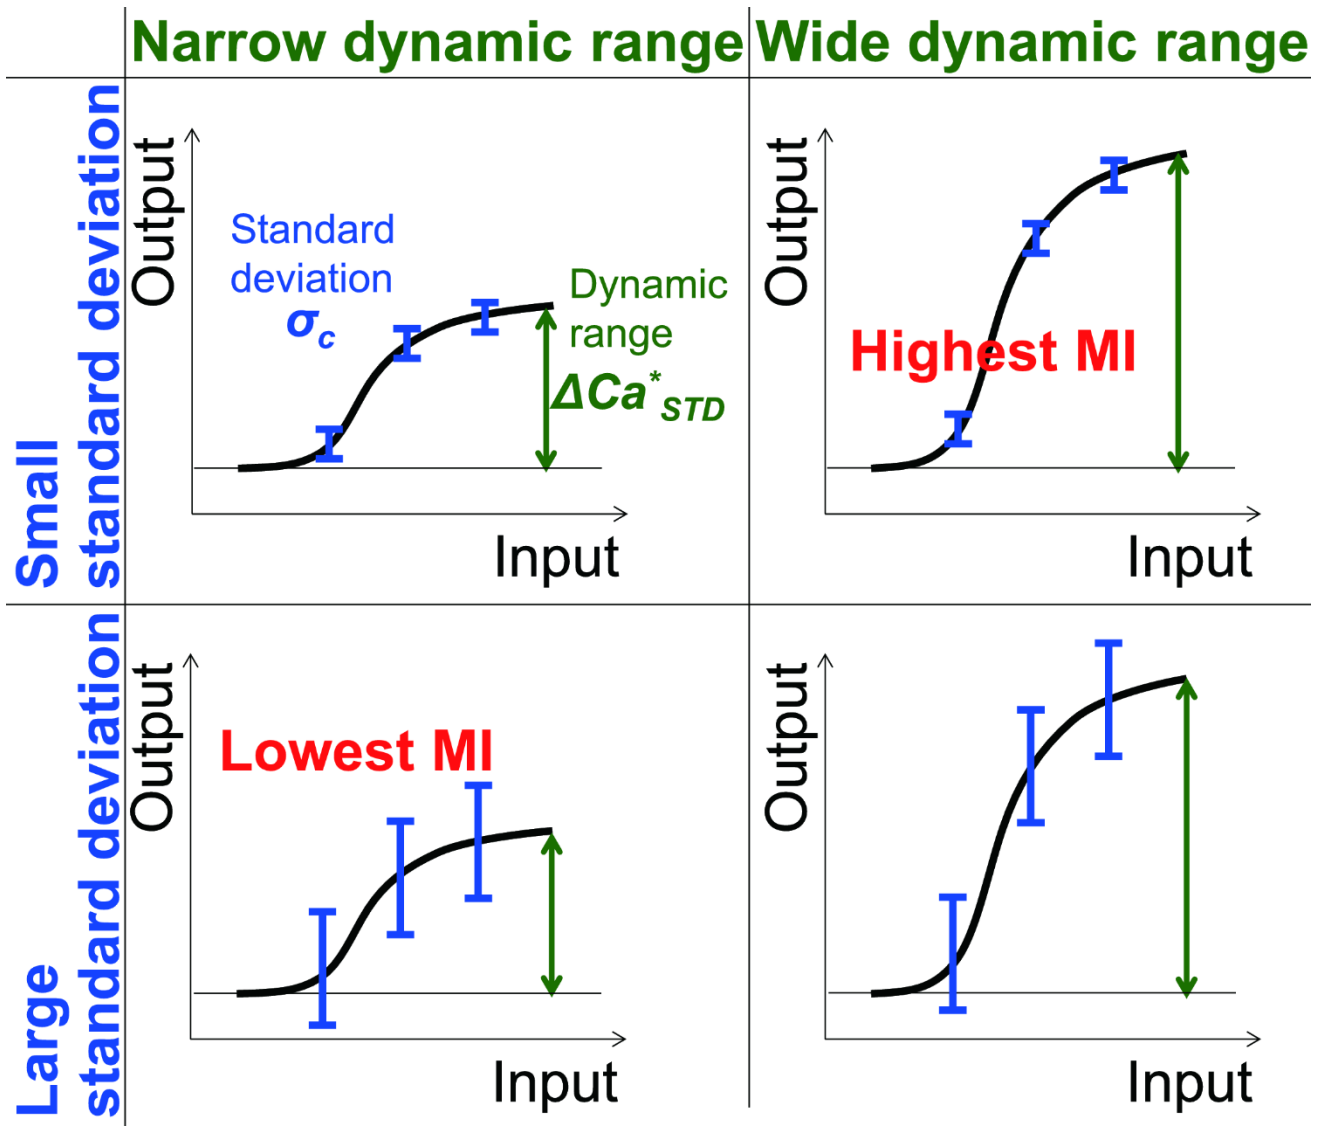

Figure S7. The mutual information depends on both  $\Delta Ca_{STD}^*$ , the dynamic range, and  $\sigma_c$ , the standard deviation of the distribution of the output. In general, if the input distribution is the same, then the wider  $\Delta Ca_{STD}^*$ , the dynamic range of the output, gives more mutual information when  $\sigma_c$ , the standard deviation of the output, is the same (compare the *left* and *right* panels). The smaller  $\sigma_c$  gives more mutual information when  $\Delta Ca_{STD}^*$  is the same (compare the *top* and *bottom* panels).

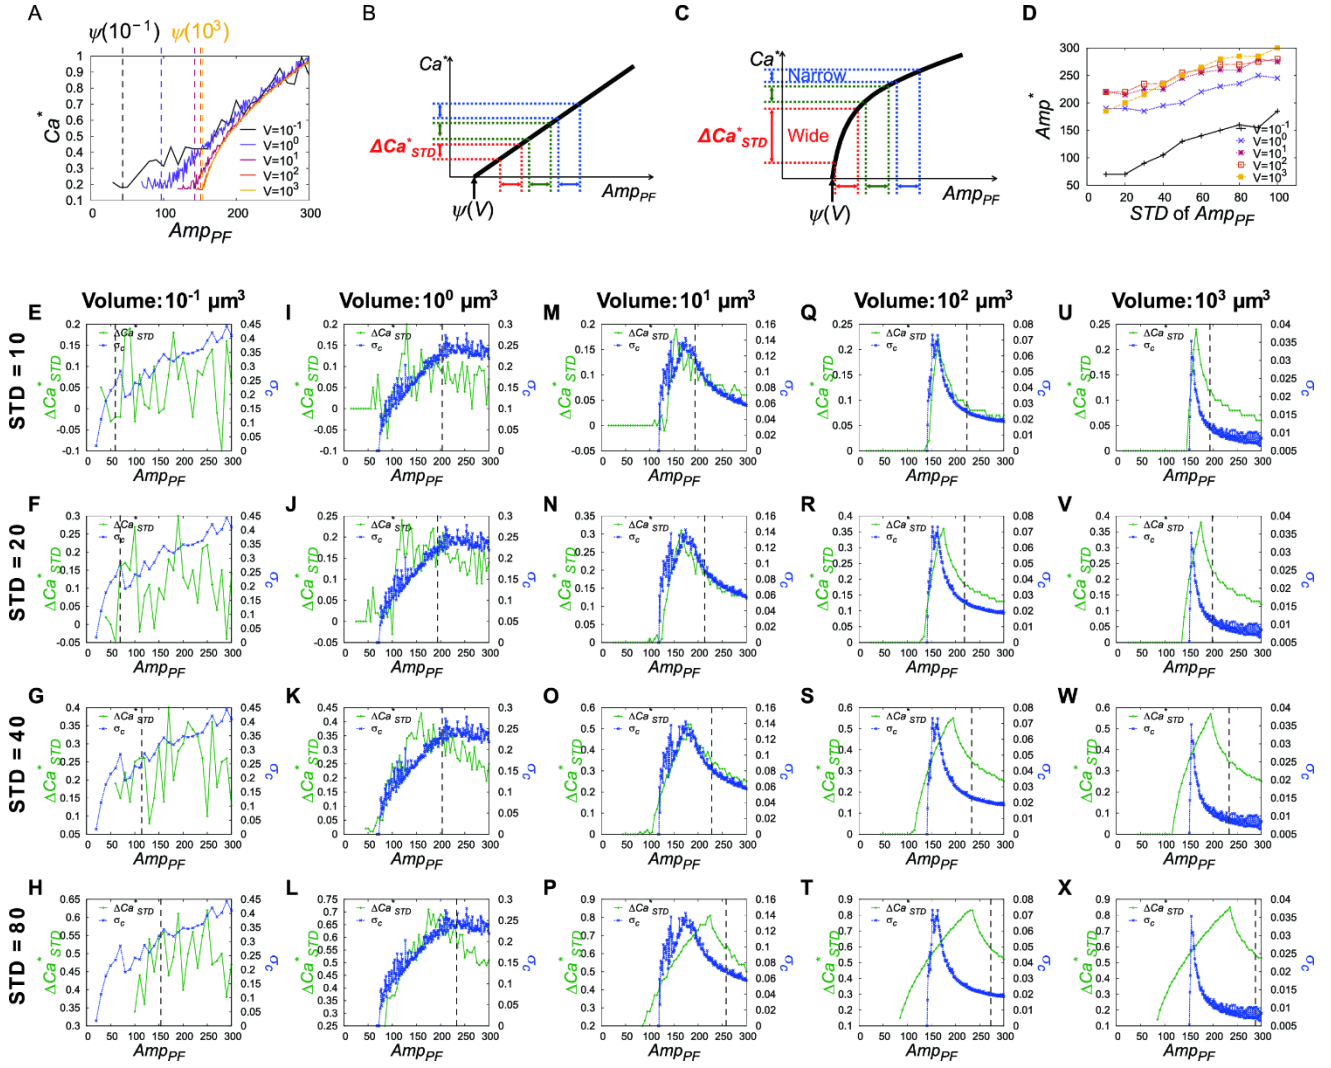

**Figure S8.**  $\Delta Ca^*_{STD}$ , the dynamic range, and  $\sigma_c$ , the standard deviation of the distribution of the output. (A) The  $Amp_{PF}$  dependency of  $Ca^*$ , the mode of the distribution of  $Ca_{res}$  for  $Ca_{res} > \theta$ . We defined  $\psi(V)$  for each volume of the  $Amp_{PF}$  when the  $Ca^*$  began to increase. In the spine volume,  $\psi(10^{-1})$  was approximately 50, whereas,  $\psi(10^3)$  was approximately 150 in the cell volume. (B, C) The schematic representation of the relationship between  $Amp_{PF}$  and  $Ca^*$  in the spine volume (B) and in the cell volume (C). (D) The STD of  $Amp_{PF}$  dependency  $Amp^*$ ,  $Amp_{PF}$  providing the maximum mutual information. (E–X) The  $Amp_{PF}$  dependencies of  $\Delta Ca^*_{STD}$ , the dynamic range of the distribution of  $Ca_{res}$  for  $Ca_{res} > \theta$ , (green) and  $\sigma_c$ , the standard deviation of the distribution of  $Ca_{res}$  (blue). The volume and STD are indicated.



## Supporting Material Tables

**Table S1. Parameters of the simple stochastic model in this study.**

| Parameters                  | Values         |
|-----------------------------|----------------|
| $\tau_{PF}$ [msec]          | 120            |
| $\tau_{CF}$ [msec]          | 10             |
| $\tau_{FB}$ [msec]          | 80             |
| $Amp_{GIP_3R}$              | 1291.6667      |
| $k$ [ $1/\mu\text{m}^3$ ]   | 626.3027       |
| $K$ [ $1/\mu\text{m}^3$ ]   | 626.3027       |
| $n_{IP_3R}$                 | 2.7            |
| $C_b$ [ $1/\mu\text{m}^3$ ] | 25.052108      |
| $V$ [ $\mu\text{m}^3$ ]     | $10^{-1}-10^3$ |

**Table S2. Parameters that are different between the cases with various PF- and CF-timing and with single PF input alone.**

| Parameters                       | Values                          |                                       |
|----------------------------------|---------------------------------|---------------------------------------|
|                                  | PF and CF input (Figs. 1 and 2) | PF input alone (Figs. 3, 4, 5, and 6) |
| $Amp_{CF}$ [ $1/\mu\text{m}^3$ ] | 361.328                         | None                                  |
| $Amp_{PF}$ [ $1/\mu\text{m}^3$ ] | $30.11 \times 5$ times          | Variable $\times 1$ time              |
| $t_{CF}$ [msec]                  | variable                        | None                                  |
| $t_{PF}$ [msec]                  | {0, 10, 20, 30, 40}             | 0                                     |
| CV of PF input                   | Variable                        | 0 (in simulation)                     |

Note that the simple deterministic model shows the same results as those of the detailed deterministic model; however, with reduction of the model, the PF and CF inputs were non-dimensional values. With the loss of the dimension of the number of molecules, we could not perform the stochastic simulation. Therefore, we re-determined the numbers of PF and CF inputs as follows: The PF input becomes smaller than 1 in the spine volume ( $10^{-1} \mu\text{m}^3$ ), but the PF input needs to be the positive integer. We increased the PF input 6-fold of the simple deterministic model so that the amount of  $\text{IP}_3$ , the mediator of PF input, is the same as that of the detailed stochastic model, resulting in the amplitude of a PF input in the spine volume of 3 ( $Amp_{PF} \times V = 30.11 \times 10^{-1} = 3.011 \simeq 3$ ). We reduced the reaction rate constant of the  $\text{Ca}^{2+}$  release by binding  $\text{IP}_3$  and  $\text{IP}_3\text{R}$  to one sixth to compensate for  $C a_{\text{IP}_3}$ . The CF input increased 6-fold so that the amount of  $\text{Ca}^{2+}$  via the CF input in the simple stochastic model became the same as that in the detailed stochastic model.

## Supporting Material Text

**Derivation: The necessary and sufficient condition for robustness is satisfied when  $\Delta C a^* \ll \sigma_c$**

We tried to examine the upper bound of the range of  $x$  where Eq. 21 in the main text is satisfied and showed that the upper bound of the range of  $x$  in the spine volume is larger than that in the cell volume. Hereafter, each distribution of  $C a_{res}$  for  $C a_{res} > \theta$  and  $C a_{res} \leq \theta$  is approximated by the Gaussian distribution. We examined Eq. 21 in the main text as satisfied when  $\sigma_c$ , the standard deviation of  $C a_{res}$ , is larger than  $\Delta C a^*$ , the gap of the gap of the mode of the distribution of  $C a_{res}$ , with  $Amp_{PF} = \mu_a + x$  and  $Amp_{PF} = \mu_a - x$ . Here, we considered the small gap of  $Amp'_{PF}$ , therefore, for simplicity,  $\sigma_c(\mu_a + x)$  and  $\sigma_c(\mu_a - x)$ , the standard deviations of  $C a_{res}$  with  $Amp_{PF} = \mu_a + x$  and  $Amp_{PF} = \mu_a - x$ , were regarded as  $\sigma_c(\mu_a)$ , the standard deviation of  $C a_{res}$  with  $Amp_{PF} = \mu_a$ , up to the upper bound of the range of  $x$  satisfying Eq. 21 in the main text (see Fig. S5A, B in the Supporting Material).

First, we considered  $p_c(C a_{res} | C a_{res} > \theta, \mu_a + x)$ , the distribution of  $C a_{res}$ , for  $C a_{res} > \theta$  in the spine and cell volumes and we approximated the distribution of  $C a_{res}$  for  $C a_{res} > \theta$  by the Gaussian distribution, given by

$$p_c(C a_{res} | C a_{res} > \theta, \mu_a + x) \simeq \frac{1}{\sqrt{2\pi\sigma_c^2}} \exp \left[ -\frac{(C a_{res} - C a^*(\mu_a + x))^2}{2\sigma_c^2} \right]. \quad (S1)$$

$C a^*$  indicates the mode of the distribution of  $C a_{res}$ , given by

$$C a^*(a) = \arg \max_{C a_{res}} p_c(C a_{res} | C a_{res} > \theta, a). \quad (S2)$$

As mentioned, we assumed  $\sigma_c \equiv \sigma_c(\mu_a \pm x) = \sigma_c(\mu_a)$ .

Then, for  $C a_{res} > \theta$ , we substituted Eqs. 26 in the main text and S1 in right side of Eq. 25 in the main text, and obtained

$$\begin{aligned}
& \frac{1}{2} [p_c(Ca_{res}|\mu_a + x) + p_c(Ca_{res}|\mu_a - x)] \\
& \simeq \frac{1}{2} \left\{ \frac{P_+(\mu_a + x)}{\sqrt{2\pi\sigma_c^2}} \exp \left[ -\frac{(Ca_{res} - Ca^*(\mu_a + x))^2}{2\sigma_c^2} \right] \right. \\
& \quad \left. + \frac{P_+(\mu_a - x)}{\sqrt{2\pi\sigma_c^2}} \exp \left[ -\frac{(Ca_{res} - Ca^*(\mu_a - x))^2}{2\sigma_c^2} \right] \right\}.
\end{aligned} \tag{S3}$$

Here, we considered  $Ca^*$ .  $Ca^*$  for  $Ca_{res} > \theta$  linearly increased from approximately  $Amp_{PF} = 50$  in the spine volume (Fig. 4A, black line). In the spine volume,  $Ca^*$  for  $Ca_{res} > \theta$  linearly increased with the increase in  $Amp_{PF}$  for  $150 \leq Amp_{PF} \leq 215$ , which corresponds to the range of the PF-CF input timing. Thus, regarding  $Ca^*$  for  $Ca_{res} > \theta$ , we could assume

$$Ca^*(\mu_a \pm x) \simeq Ca^*(\mu_a) \pm \Delta Ca^*(x). \tag{S4}$$

Equation S4 indicates that the difference of  $Ca^*$  with  $Amp_{PF} = \mu_a + x$  and with  $Amp_{PF} = \mu_a$  is the same as that with  $Amp_{PF} = \mu_a$  and with  $Amp_{PF} = \mu_a - x$ , where  $\Delta Ca^*$  indicates the difference of  $Ca^*$  with  $Amp_{PF} = \mu_a \pm x$  and with  $Amp_{PF} = \mu_a$ . In contrast to the spine volume, in the cell volume,  $Ca^*$  abruptly increased at  $Amp_{PF} = 150$ , and gradually increased with the increase in  $Amp_{PF}$  (Fig. S5C in the Supporting Material, yellow line). Therefore, in the cell volume, Eq. S4 is not satisfied at  $Amp_{PF} = 150$ , but it is almost satisfied for  $150 < Amp_{PF} \leq 215$ . Then, we substituted Eq. S4 in the Eq. S3, and obtained

$$\begin{aligned}
&\simeq \frac{1}{2} \left\{ \frac{P_+(\mu_a + x)}{\sqrt{2\pi\sigma_c^2}} \exp \left[ -\frac{(Ca_{res} - Ca^*(\mu_a) - \Delta Ca^*(x))^2}{2\sigma_c^2} \right] \right. \\
&\quad \left. + \frac{P_+(\mu_a - x)}{\sqrt{2\pi\sigma_c^2}} \exp \left[ -\frac{(Ca_{res} - Ca^*(\mu_a) + \Delta Ca^*(x))^2}{2\sigma_c^2} \right] \right\} \\
&= \frac{1}{2\sqrt{2\pi\sigma_c^2}} \exp \left[ -\frac{(Ca_{res} - Ca^*(\mu_a))^2}{2\sigma_c^2} \right] \exp \left[ -\frac{\Delta Ca^*(x)^2}{2\sigma_c^2} \right] \\
&\times \left\{ P_+(\mu_a + x) \exp \left[ \frac{(Ca_{res} - Ca^*(\mu_a))\Delta Ca^*(x)}{\sigma_c^2} \right] \right. \\
&\quad \left. + P_+(\mu_a - x) \exp \left[ -\frac{(Ca_{res} - Ca^*(\mu_a))\Delta Ca^*(x)}{\sigma_c^2} \right] \right\}.
\end{aligned} \tag{S5}$$

Here, we considered the range of  $Ca_{res}$  where  $|Ca_{res} - Ca^*(x)| \leq 3\sigma_c(x)$  is almost satisfied.

Hence, if  $\Delta Ca^*(x) \ll \sigma_c(x)$ , then, we could approximate

$$\simeq \frac{1}{\sqrt{2\pi\sigma_c^2}} \exp \left[ -\frac{(Ca_{res} - Ca^*(\mu_a))^2}{2\sigma_c^2} \right] \left\{ \frac{P_+(\mu_a + x) + P_+(\mu_a - x)}{2} \right\}. \tag{S6}$$

Note that, the upper bound of the range of  $x$  where  $\Delta Ca^* \ll \sigma_c$  determines the upper bound of the range where Eq. 21 in the main text is satisfied. This means that the larger upper bound of the range of  $x$  where  $\Delta Ca^* \ll \sigma_c$  corresponds to the maximum of  $CV_a$  with which the distribution of  $Ca_{res}$  does not change.

Here, we considered the probability that  $Ca_{res}$  exceeds the threshold  $\theta$ ,  $P_+$ . In the spine volume,  $P_+$  gradually increased from  $Amp_{PF} = 50$  and linearly increased for  $100 \leq Amp_{PF} \leq 250$  (Fig. S5D in the Supporting Material, black line). Therefore, in the spine volume,  $P_+$  linearly increased with the increase in  $Amp_{PF}$  for  $150 \leq Amp_{PF} \leq 215$ , which corresponds to the range of the PF-CF input timing. Thus, regarding  $P_+$ , we could assume

$$\frac{1}{2} [P_+(\mu_a + x) + P_+(\mu_a - x)] = P_+(\mu_a). \tag{S7}$$

This equation indicates that the average of the probabilities that  $Ca_{res}$  exceeds the threshold  $\theta$  with  $Amp_{PF} = \mu_a + x$  and  $Amp_{PF} = \mu_a - x$  is the same as the probability that  $Ca_{res}$  exceeds the threshold  $\theta$  with  $Amp_{PF} = \mu_a$ . In the cell volume, the distribution of  $Ca_{res}$  was unimodal, and  $\theta = -\infty$  was assumed; therefore,  $P_+$  was always 1 and Eq. S7 was always satisfied. Therefore, we substituted Eq. S7 in the Eq. S6 and obtained

$$\begin{aligned} \frac{1}{2} [p_c(Ca_{res}|\mu_a + x) + p_c(Ca_{res}|\mu_a - x)] &\simeq \frac{P_+(\mu_a)}{\sqrt{2\pi\sigma_c^2}} \exp \left[ -\frac{(Ca_{res} - Ca^*(\mu_a))^2}{2\sigma_c^2} \right] \\ &= p_c(Ca_{res}|\mu_a) \end{aligned} \quad (S8)$$

for  $Ca_{res} > \theta$ , *i.e.*, Eq. 21 in the main text for  $Ca_{res} > \theta$  is satisfied.

However, for  $Ca_{res} \leq \theta$ , because  $Ca^*$  for  $Ca_{res} \leq \theta$  was almost constant, the distribution  $Ca_{res}$  was mainly characterized only by  $P_-$  of the distribution of  $Ca_{res}$ , indicating

$$p_c(Ca_{res}|Ca_{res} \leq \theta, \mu_a) = p_c(Ca_{res}|Ca_{res} \leq \theta, \mu_a \pm x). \quad (S9)$$

Then, using Eq. 21 in the main text for  $Ca_{res} \leq \theta$ , similar to the case for  $Ca_{res} > \theta$ , we obtained

$$\begin{aligned} &\frac{1}{2} [p_c(Ca_{res}|\mu_a + x) + p_c(Ca_{res}|\mu_a - x)] \\ &\simeq \frac{1}{2} [P_-(\mu_a + x)p_c(Ca_{res}|Ca_{res} \leq \theta, \mu_a + x) \\ &\quad + P_-(\mu_a - x)p_c(Ca_{res}|Ca_{res} \leq \theta, \mu_a - x)] \\ &= \frac{1}{2} [P_-(\mu_a + x)p_c(Ca_{res}|Ca_{res} \leq \theta, \mu_a) + P_-(\mu_a - x)p_c(Ca_{res}|Ca_{res} \leq \theta, \mu_a)] \\ &\simeq \frac{1}{2} [P_-(\mu_a + x) + P_-(\mu_a - x)]p_c(Ca_{res}|Ca_{res} \leq \theta, \mu_a) \\ &= P_-(\mu_a)p_c(Ca_{res}|Ca_{res} \leq \theta, \mu_a) = p_c(Ca_{res}|\mu_a) \end{aligned} \quad (S10)$$

for  $Ca_{res} \leq \theta$ , *i.e.*, Eq. 21 in the main text for  $Ca_{res} \leq \theta$  is also satisfied. Therefore, from Eqs. S8 and S10, we derived Eq. 21 in the main text. Thus, we approximately showed that if  $Ca^*$  and  $P_+$  linearly

increase with the increase in  $Amp_{PF}$  and  $\Delta C a^* \ll \sigma_c$ , then Eq. 21 in the main text was satisfied. This means that the necessary and sufficient condition for robustness is satisfied in the range where the intrinsic noise,  $\sigma_c$ , is larger than the extrinsic noise,  $\Delta C a^*$ .
